1 **Title: Preclinical evaluation of a SARS-CoV-2 mRNA vaccine PTX-COVID19-B**

2

3 **Authors:** Jun Liu<sup>1\*†</sup>, Patrick Budykowski<sup>1, 2†</sup>, Reuben Samson<sup>3, 4†</sup>, Bryan D. Griffin<sup>5</sup>,

4 Giorgi Babuadze<sup>5</sup>, Bhavisha Rathod<sup>4</sup>, Karen Colwill<sup>4</sup>, Jumai A. Abioye<sup>6</sup>, Jordan A

5 Schwartz<sup>6</sup>, Ryan Law<sup>7</sup>, Lily Yip<sup>5</sup>, Sang Kyun Ahn<sup>3</sup>, Serena Chau<sup>7</sup>, Maedeh

6 Naghibosadat<sup>5</sup>, Yuko Arita<sup>6</sup>, Queenie Hu<sup>4</sup>, Feng Yun Yue<sup>1</sup>, Arinjay Banerjee<sup>8, 9, 10</sup>, Karen

7 Mossman<sup>11</sup>, Samira Mubareka<sup>5, 12</sup>, Robert A. Kozak<sup>5</sup>, Michael S. Pollanen<sup>12</sup>, Natalia

8 Martin Orozco<sup>6</sup>, Anne-Claude Gingras<sup>3, 4</sup>, Eric G. Marcusson<sup>6, 13\*‡</sup>, Mario A. Ostrowski<sup>1,</sup>

9 7, 14\*‡

10 **Affiliations:**

11 <sup>1</sup>Department of Medicine, University of Toronto; Toronto, ON, Canada.

12 <sup>2</sup>Institute of Medical Science, University of Toronto; Toronto, ON, Canada.

13 <sup>3</sup>Department of Molecular Genetics, University of Toronto; Toronto, ON, Canada.

14 <sup>4</sup>Lunenfeld-Tanenbaum Research Institute at Mount Sinai Hospital, Sinai Health System;

15 Toronto, ON, Canada.

16 <sup>5</sup>Sunnybrook Research Institute; Toronto, ON, Canada.

17 <sup>6</sup>Providence Therapeutics Holdings, Inc.; Calgary, Alberta, Canada.

18 <sup>7</sup>Department of Immunology, University of Toronto; Toronto, ON, Canada.

19 <sup>8</sup>Vaccine and Infectious Disease Organization, University of Saskatchewan; Saskatoon,

20 SK, Canada

21 <sup>9</sup>Department of Veterinary Microbiology, University of Saskatchewan; Saskatoon, SK,

22 Canada

23 <sup>10</sup>Department of Biology, University of Waterloo; Waterloo, ON, Canada

24 <sup>11</sup>Department of Medicine, McMaster University; Hamilton, ON, Canada.

25 <sup>12</sup>Department of Laboratory Medicine and Pathology, University of Toronto; Toronto,  
26 ON, Canada.

27 <sup>13</sup>Marcusson Consulting, San Francisco, CA, USA

28 <sup>14</sup>Keenan Research Centre for Biomedical Science of St. Michael's Hospital, Unity  
29 Health Toronto; Toronto, ON, Canada

30 †: Co-first author

31 ‡: Co-senior corresponding author

32 \*Correspondence should be addressed to: Jun Liu or Eric G. Marcusson or Mario

33 Ostrowski. Jun Liu and Mario Ostrowski are at Room 6368, Medical Sciences Building,

34 1 King's College Circle, Toronto, ON M5S1A8, Canada. Tel: 416-946-7634. Fax: 416-

35 978-8765. Email: [junut.liu@gmail.com](mailto:junut.liu@gmail.com) or [mario.ostrowski@gmail.com](mailto:mario.ostrowski@gmail.com). Eric G.

36 Marcusson is at Providence Therapeutics Holdings, Inc. 335 25 Street SE, Calgary, AB,

37 Canada T2A 7H8, Tel: 403-440-3599. Email: [eric@providencetherapeutics.com](mailto:eric@providencetherapeutics.com).

38 **Abstract:**

39 Safe and effective vaccines are needed to end the COVID-19 pandemic caused by  
40 SARS-CoV-2. Here we report the preclinical development of a lipid nanoparticle (LNP)  
41 formulated SARS-CoV-2 mRNA vaccine, PTX-COVID19-B. PTX-COVID19-B was  
42 chosen among three candidates after the initial mouse vaccination results showed that it  
43 elicited the strongest neutralizing antibody response against SARS-CoV-2. Further tests  
44 in mice and hamsters indicated that PTX-COVID19-B induced robust humoral and  
45 cellular immune responses and completely protected the vaccinated animals from SARS-  
46 CoV-2 infection in the lung. Studies in hamsters also showed that PTX-COVID19-B  
47 protected the upper respiratory tract from SARS-CoV-2 infection. Mouse immune sera  
48 elicited by PTX-COVID19-B vaccination were able to neutralize SARS-CoV-2 variants  
49 of concern (VOCs), including the B.1.1.7, B.1.351 and P.1 lineages. No adverse effects  
50 were induced by PTX-COVID19-B in both mice and hamsters. These preclinical results  
51 indicate that PTX-COVID19-B is safe and effective. Based on these results, PTX-  
52 COVID19-B was authorized by Health Canada to enter clinical trials in December 2020  
53 with a phase 1 clinical trial ongoing (ClinicalTrials.gov number: NCT04765436).

54 **One Sentence Summary:** PTX-COVID19-B is a SARS-CoV-2 mRNA vaccine that is  
55 highly immunogenic, safe, and effective in preventing SARS-CoV-2 infection in mice  
56 and hamsters and is currently being evaluated in human clinical trials.

57

58

59 **Main Text:**

60 **INTRODUCTION**

61 COVID-19 (Coronavirus Disease 2019) caused by SARS-CoV-2 (severe acute  
62 respiratory syndrome coronavirus 2) is one of the most severe health crises in human  
63 history. Since it was first reported in December 2019, more than 155 million COVID-19  
64 cases and 3.2 million deaths have been documented and the pandemic is still spreading  
65 (1). Public health measures, such as social distancing, mask wearing, contact tracing,  
66 quarantine, and national lockdowns have only partially stymied the pandemic. Some  
67 treatment regimens were shown to suppress SARS-CoV-2 replication, and/or reduce the  
68 number of severe COVID-19 cases and deaths (2-6). Despite these advances in  
69 prevention and treatment, safe and effective SARS-CoV-2 vaccines are ultimately needed  
70 for sustainable control of the pandemic and a return to normalcy.

71 With unprecedented speed, hundreds of SARS-CoV-2 vaccine candidates have  
72 been designed and produced, with 280 tested in animals since the beginning of the  
73 pandemic (7, 8). Among them, 13 have been approved for emergency use in humans, and  
74 dozens, including the PTX-COVID19-B reported here, are at various stages of clinical  
75 trials (7). Given the current world population requiring vaccination, the variable  
76 conditions of public health infrastructure in different countries, and the rapid emergence  
77 of COVID-19 variants of concern (VOCs) that may escape vaccine-induced immune  
78 responses (9-12), continued and concerted global efforts in SARS-CoV-2 vaccine  
79 research, development, manufacturing and deployment are required to end the COVID-19  
80 pandemic (13).

81 SARS-CoV-2 is an enveloped positive-sense RNA virus that uses the spike  
82 protein (S) on its surface to bind the angiotensin-converting enzyme 2 (ACE2) on host  
83 cells for entry to initiate replication (14-19). The S protein has two subunits: S1 and S2.  
84 S1 is responsible for binding to ACE2 through its receptor-binding domain (RBD). Once  
85 bound, S1 is shed from the envelope, exposing S2, which is then inserted into the host  
86 cell membrane to mediate fusion of virus envelope and cell membrane to release the viral  
87 genetic material into the host cells for replication. In contrast to SARS-CoV and other  
88 group 2B coronaviruses, SARS-CoV-2 has a furin cleavage site between the S1 and S2  
89 subunit, which promotes infection of cells expressing the transmembrane serine protease  
90 2 (TMPRSS2) on their surface, e.g. human respiratory tract epithelial cells (14, 20-22).  
91 The S protein is also the main target of host generated neutralizing antibodies (nAb) that  
92 can inhibit SARS-CoV-2 infection, e.g. by blocking its binding to ACE2 (23-30). Thus,  
93 most of the current SARS-CoV-2 vaccines use S protein as the immunogen.

94 mRNA-based vaccines are attractive platforms for prophylactic SARS-CoV-2  
95 vaccine candidates due to their unique advantages, including rapid large-scale production,  
96 strong immunogenicity in both humoral and cellular immunity, and ease of adaptation to  
97 tackle the emerging VOCs (31, 32). Two SARS-CoV-2 mRNA vaccines were the earliest  
98 to enter phase 3 clinical trials, showing both high efficacy and safety, and were the first to  
99 be approved for emergency use in humans (33, 34). Here, we report the preclinical results  
100 of another SARS-CoV-2 mRNA vaccine, PTX-COVID19-B. We found that PTX-  
101 COVID19-B elicited potent humoral and cellular immune responses in mice, and  
102 protected both mice and hamsters from SARS-CoV-2 challenges. Based on these results,

- 103 PTX-COVID19-B was authorized by Health Canada to enter clinical trials with a phase 1  
104 clinical trial underway (ClinicalTrials.gov number: NCT04765436).

## 105 **RESULTS**

### 106 **SARS-CoV-2 mRNA vaccine candidates**

107 We first designed 3 SARS-CoV-2 mRNA vaccine candidates and compared their  
108 immunogenicity in mice: an RBD construct (amino acids 319-541), a full-length S  
109 construct (amino acids 1-1273), and an S<sub>furinmut</sub> construct in which NSPRRA (amino acids  
110 679-684) in the full-length S were replaced with IL to remove the furin cleavage site  
111 between S1 and S2 (Fig. 1A). The coding sequences of all 3 constructs were based on the  
112 S protein from the SARS-CoV-2 Wuhan-Hu-1 isolate (GenBank accession number:  
113 MN908947.3) except for a D614G substitution in the S and S<sub>furinmut</sub> constructs to match  
114 this amino acid location to that of the current dominant circulating strains (18, 35). The  
115 RBD construct was included for testing since it is the main target of neutralizing  
116 antibodies (23, 24, 26-28, 30). The S<sub>furinmut</sub> construct was made as it has been shown that  
117 removing the furin cleavage sites in some viral envelope proteins can enhance their  
118 expression and stability, especially when their ectodomains are expressed as soluble  
119 proteins (36-39). Expression of the protein encoded by these mRNA constructs on the  
120 surface of transfected HEK293T cells was detected by flow cytometry, and in the  
121 supernatant by ELISA, using an RBD-specific neutralizing mAb COV2-2165 (30) (Fig.  
122 S1A and S1B). As expected, both the S and S<sub>furinmut</sub> proteins encoded by the mRNA  
123 constructs were expressed on the cell surface. The expressed RBD construct was detected  
124 only in the supernatant, consistent with its expression in soluble form. Some S protein  
125 could also be detected in the supernatant of the S mRNA-transfected cells, possibly due  
126 to the furin-cleavage of the membrane-bound S protein.

127 To compare the immunogenicity of the 3 mRNA constructs, female C57BL/6  
128 mice were vaccinated twice, 3 weeks apart, with 20  $\mu$ g of each of the constructs  
129 formulated in lipid nanoparticle (LNP) (Fig. 1B). Control mice received either 20  $\mu$ g of  
130 an mRNA encoding tdTomato in the same LNP, or the same volume of Dulbecco's  
131 phosphate-buffered saline (DPBS). Blood was collected 3 weeks post boost vaccination,  
132 and the presence of neutralizing antibodies (nAb) in the sera was measured by a micro-  
133 neutralization assay using a SARS-CoV-2 virus isolated from a SARS-CoV-2 patient  
134 (SARS-CoV-2-SB2-P3 PB Clone 1 (40)) (Fig. 1C). We found that the full-length S  
135 mRNA candidate elicited the highest nAb levels in the sera of vaccinated mice, followed  
136 closely by the  $S_{\text{furinmut}}$  mRNA candidate. Median nAb ID<sub>50</sub> titer was 4991 (interquartile  
137 range (IQR) 1927-5188) and 3085 (IQR 2528-4991) for the S and  $S_{\text{furinmut}}$  mRNA,  
138 respectively. The RBD mRNA candidate induced low nAb levels (median 19.8, IQR 5.5-  
139 26.0). No nAb was detected in the sera from control mice receiving DPBS, and low levels  
140 of nAbs were detected in the sera of 2 out of 8 control mice receiving the tdTomato  
141 mRNA (nAb ID<sub>50</sub> titer was 19 and 82, respectively). Of note, the median serum nAb titer  
142 of the S and  $S_{\text{furinmut}}$  mRNA-vaccinated mice was 83.1-fold and 51.4-fold higher than that  
143 of 8 COVID-19 convalescent patients (median nAb ID<sub>50</sub> titer 60, IQR 22.0-104.8, 2  
144 patients in each category of severe, moderate, mild, and asymptomatic SARS-CoV-2  
145 infections), respectively (Fig. 1C). Similar results were obtained when the serum nAb  
146 was measured by a lentivirus-based SARS-CoV-2 pseudovirus neutralization assay,  
147 though the nominal nAb ID<sub>50</sub> titers from the pseudovirus assay were usually higher than  
148 those from the micro-neutralization assay (Fig. 1C). Based on these results, the full-



149 length S mRNA construct, hereafter named PTX-COVID19-B, was chosen for further  
150 testing and moved into the next stages of development.

### 151 **Humoral immune responses elicited by PTX-COVID19-B vaccination**

152 To further evaluate the immunogenicity of PTX-COVID19-B, female C57BL/6 mice  
153 were vaccinated twice, 3 weeks apart, with 1 or 10  $\mu\text{g}$  doses of PTX-COVID19-B or, as  
154 control, 10  $\mu\text{g}$  of LNP formulated tdTomato mRNA. Three weeks after the boost  
155 vaccination, blood and spleens were collected from the mice to measure humoral and  
156 cellular immune responses. We first used an ELISA assay to measure S-specific binding  
157 antibodies in the sera of the mice. As shown in Fig. 2A, both 1 and 10  $\mu\text{g}$  doses of PTX-  
158 COVID19-B elicited very strong S-specific total IgG, IgG1, IgG2b and IgG2c responses  
159 (median  $\text{EC}_{50}$  titers for 1 and 10  $\mu\text{g}$  PTX-COVID19-B are, respectively:  $1.5 \times 10^4$  (IQR  
160  $8.1 \times 10^3$  -  $2.2 \times 10^4$ ),  $1.1 \times 10^5$  (IQR  $7.3 \times 10^4$  -  $1.5 \times 10^5$ ) for total IgG;  $8.3 \times 10^3$  (IQR  $3.9 \times 10^3$   
161 -  $1.5 \times 10^4$ ),  $1.7 \times 10^4$  (IQR  $1.1 \times 10^4$  -  $2.9 \times 10^4$ ) for IgG1;  $5.2 \times 10^3$  (IQR  $3.0 \times 10^3$  -  $6.7 \times 10^3$ ),  
162  $5.9 \times 10^4$  (IQR  $4.4 \times 10^4$  -  $6.3 \times 10^4$ ) for IgG2b;  $2.2 \times 10^4$  (IQR  $1.3 \times 10^4$  -  $7.6 \times 10^4$ ),  $1.6 \times 10^6$   
163 (IQR  $1.1 \times 10^6$  -  $3.6 \times 10^6$ ) for IgG2c). The 10  $\mu\text{g}$  dose of PTX-COVID19-B usually  
164 induced higher S-specific binding antibodies than the 1  $\mu\text{g}$  dose. The preponderance of  
165 the Th1 antibody (IgG2b and IgG2c) over the Th2 antibody (IgG1) also indicated that  
166 PTX-COVID19-B induced a Th1-biased antibody response. Very low levels of anti-S  
167 antibodies were detected in the sera of control mice receiving the tdTomato mRNA.

168 We then measured nAb against SARS-CoV-2 in these C57BL/6 mouse sera.  
169 Results of SARS-CoV-2 authentic virus micro-neutralization assay showed that the 10  $\mu\text{g}$   
170 dose of PTX-COVID19-B elicited high nAb levels (median nAb  $\text{ID}_{50}$  titer was 1259, IQR  
171 652.7-1770), which was 21.0-fold higher than that of the 8 COVID-19 convalescent

172 patients (Fig. 2B and 1C). Low levels of nAb were induced by the 1  $\mu$ g dose of PTX-  
173 COVID19-B, which, for the majority of mice, could only be detected by the pseudovirus  
174 assay, which is more sensitive (Fig. 2B). No detectable nAb was present in the sera of the  
175 mice receiving tdTomato mRNA by either assay.

176 To further verify the ability of PTX-COVID19-B in inducing a nAb response  
177 against SARS-CoV-2 virus, we vaccinated a different strain of mice, BALB/c, and  
178 included both sexes in the vaccination, using the same vaccination regimen as described  
179 above. Three weeks after the boost vaccination, sera were collected and nAb levels were  
180 measured. As shown in Fig. 2C, both 4  $\mu$ g and 20  $\mu$ g doses of PTX-COVID19-B elicited  
181 potent nAb responses in both male and female BALB/c mice. The 20  $\mu$ g dose of PTX-  
182 COVID19-B induced higher nAb titers than 4  $\mu$ g, although this only reached statistical  
183 significance in male mice. No detectable nAb was detected in the sera of the control mice  
184 receiving formulation buffer.

#### 185 **Neutralization of VOCs by PTX-COVID19-B elicited immune sera**

186 VOCs evade neutralization by sera from SARS-CoV-2 vaccinees, raising concerns about  
187 the efficacy of current SARS-CoV-2 vaccines. Using the pseudovirus assay (here,  
188 lentivirus particles pseudotyped to harbor the same mutations in the S protein that are  
189 found in circulating VOCs), we measured neutralization of VOCs by immune sera from  
190 PTX-COVID19-B vaccinated C57BL/6 mice. These VOCs include the B.1.1.7 lineage  
191 first detected in UK (41), the B.1.351 lineage in South Africa (42), and the P.1 lineage in  
192 Brazil (43) (Fig. 3A). As shown in Fig. 3B and 3C, compared to the Wuhan-Hu-1  
193 pseudotyped lentivirus, B.1.1.7 pseudovirus was slightly resistant to neutralization by the  
194 mouse immune sera but this difference did not reach statistical significance. However,

195 B.1.351 and P.1 pseudoviruses significantly reduced the neutralizing potency of the  
196 immune sera. For example, median serum nAb ID<sub>50</sub> titer of the mice receiving a 10µg  
197 dose of PTX-COVID19-B was decreased by 25.0-fold and 11.1-fold against B.1.351 and  
198 P.1 pseudoviruses respectively, compared to Wuhan-Hu-1 pseudovirus. It should be  
199 noted that the nominal serum nAb ID<sub>50</sub> titers of the immune sera from 10µg PTX-  
200 COVID19-B vaccinated mice against these VOCs are still very high, with median titers  
201 ranging from  $3.2 \times 10^3$  to  $6.4 \times 10^4$  for the different VOCs tested.

### 202 **Cellular immune responses elicited by PTX-COVID19-B vaccination**

203 C57BL/6 mice vaccinated with 1 µg and 10 µg of PTX-COVID19-B were humanly  
204 euthanized 21 days after the boost vaccination and splenocytes were stimulated with an S  
205 peptide pool (315 15-mer peptides with 11-amino-acid overlaps encompassing the entire  
206 S protein) to measure IFN-γ producing cells by ELISPOT (Fig. 4A). The 1 µg and 10 µg  
207 PTX-COVID19-B vaccinated mice had  $2356 \pm 369.7$  and  $2810 \pm 280.9$  (mean±SEM) IFN-γ  
208 spot-forming units per million splenocytes respectively, suggesting a strong Th1  
209 response. Moreover, when splenocytes from both sexes of BALB/c mice immunized with  
210 4 µg and 20 µg of PTX-COVID19-B were evaluated via IFN-γ and IL-4 ELISPOT,  
211 several hundreds of IFN-γ spot-forming units per million splenocytes on average were  
212 detected in immunized mice while very few IL-4 spot-forming units above the  
213 background were detected (Fig. 4B). This indicates a strong Th1 response driven by the  
214 vaccination even in a mouse strain (BALB/c) with a tendency for Th2 responses.

215 Additionally, cytokine producing CD4<sup>+</sup> and CD8<sup>+</sup> T cells in splenocytes of  
216 C57BL/6 mice immunized with 1 and 10 µg of vaccine were analyzed by flow cytometry  
217 following overnight S peptide pool stimulation and intracellular cytokine staining (Fig.

218 4C). CD4<sup>+</sup> T cells had increased percentages of IFN- $\gamma$ , TNF- $\alpha$  and IL-2 producing cells,  
219 and very low percentages of IL-4 and IL-5 producing cells, indicating a strong induction  
220 of a Th1 response. Interestingly, CD8<sup>+</sup> T cells showed a high number of IFN- $\gamma$  producing  
221 cells, which was higher in percentage than that of CD4<sup>+</sup> T cells (Fig. 4C and Fig. S2).  
222 These results contrast the T cell responses identified in COVID-19 patients, where CD4<sup>+</sup>  
223 T cell responses against SARS-CoV-2 outweigh CD8<sup>+</sup> T cells (44-48).

224 Furthermore, cytokines were measured in the supernatants of S peptide pool  
225 stimulated splenocytes from C57BL/6 vaccinated mice by a multiplex immunoassay (Fig.  
226 4D), and the results confirmed a strong production of IFN- $\gamma$  and IL-2 that correlates with  
227 the flow cytometry and ELISPOT data. Collectively, these results indicate that PTX-  
228 COVID19-B vaccination induced robust Th1-biased CD4<sup>+</sup> and CD8<sup>+</sup> T cell responses.

### 229 **PTX-COVID19-B protecting mice from SARS-CoV-2 challenge**

230 Since wild-type mice are not susceptible to ancestral SARS-CoV-2 infection, we utilized  
231 an AAV6 (adeno-associated virus type 6)-hACE2 mouse model to test if PTX-  
232 COVID19-B can protect mice from SARS-CoV-2 infection. A similar mouse model  
233 using AAV type 9 to transduce hACE2 into mice was reported to support SARS-CoV-2  
234 replication in mouse lungs (49). In our model, mice were first transduced with AAV6-  
235 hACE2 intranasally to express hACE2 in their respiratory tracts and 9 days later were  
236 intranasally inoculated with SARS-CoV-2 (Fig. 5A and Fig. S3). As shown in Fig. S3  
237 and consistent with the previous report, AAV6-mediated hACE2 transduction induced  
238 susceptibility to SARS-CoV-2 infection as shown by the detection of infectious SARS-  
239 CoV-2 in the lungs of AAV6-hACE2 mice but not in control mice transduced with  
240 AAV6-luciferase (Fig. S3A). Using a real-time RT-PCR assay targeting the SARS-CoV-

241 2 envelope (E) gene, we also detected a high amount of SARS-CoV-2 genomic RNA in  
242 the lungs from both AAV6-hACE2 and AAV6-luciferase transduced mice, although the  
243 genomic RNA copy numbers were much lower in the lungs of the AAV6-luciferase  
244 transduced mice than the AAV6-hACE2 mice (Fig. S3B).

245         Having confirmed that the AAV6-hACE2 mouse model was susceptible to SARS-  
246 CoV-2 infection, we vaccinated 4 groups of C57BL/6 mice twice with 3 different doses  
247 of PTX-COVID19-B (1  $\mu$ g, 4  $\mu$ g and 20  $\mu$ g), and as control, the formulation buffer for  
248 PTX-COVID19-B (Fig. 5). One week after the boost vaccination, all mice were  
249 transduced with AAV6-hACE2 followed by SARS-CoV-2 challenge 9 days later. Four  
250 days post challenge (4 dpi), lungs were collected and infectious SARS-CoV-2 virus in the  
251 lung tissue homogenates was quantified. Infectious SARS-CoV-2 virus was present in the  
252 lungs from 11 out of 12 control mice receiving the formulation buffer (Fig. 5B, median  
253 TCID<sub>50</sub>/100mg lung was 1950, IQR 550-3500). In contrast, no infectious virus was  
254 detected in the lungs from mice vaccinated with 4  $\mu$ g or 20  $\mu$ g doses of PTX-COVID19-  
255 B. For the mice receiving a 1  $\mu$ g dose of PTX-COVID19-B, low levels of infectious virus  
256 was found in only 2 out of 12 mice (TCID<sub>50</sub>/100mg lung=7 and 8, respectively). SARS-  
257 CoV-2 genomic RNA could be detected in the lungs of all mice using the E-gene specific  
258 real time RT-PCR assay, but was reduced on average by 166-fold, 75-fold, and 16-fold in  
259 the mice receiving 20  $\mu$ g, 4  $\mu$ g, and 1  $\mu$ g doses of PTX-COVID19-B, respectively,  
260 compared to the mice receiving formulation buffer (Fig. 5C). We also measured the nAb  
261 titers in the sera collected on 4 dpi and found high levels of nAb in the sera from the mice  
262 vaccinated with 20  $\mu$ g and 4  $\mu$ g doses of PTX-COVID19-B and moderate levels of nAb  
263 from the mice receiving a 1  $\mu$ g dose of PTX-COVID19-B (Fig. 5D). Given the short time

264 after SARS-CoV-2 challenge (4 dpi), the nAb levels in these mouse sera was most likely  
265 elicited by the vaccination, not induced or boosted by the SARS-CoV-2 infection. Of  
266 note, the serum nAb ID<sub>50</sub> titers negatively correlate with the quantities of the infectious  
267 SARS-CoV-2 virus and the genomic RNA in the lungs (Fig. S4). Logistic regression  
268 modeling of the nAb ID<sub>50</sub> titers and the virus TCID<sub>50</sub> values indicates that a threshold  
269 nAb ID<sub>50</sub> titer of 654.9 against authentic virus predicts a 95% probability of protection  
270 from productive SARS-CoV-2 infection. Taken together, these data indicate that PTX-  
271 COVID19-B completely protected mice from pulmonary infection by SARS-CoV-2,  
272 even at a low dose of 4 µg.

### 273 **PTX-COVID19-B protecting hamsters from SARS-CoV-2 challenge**

274 Syrian hamsters are susceptible to and can transmit SARS-CoV-2 infection, mimicking  
275 some aspects of SARS-CoV-2 infection in humans (50, 51). We thus tested the efficacy  
276 of PTX-COVID19-B in Syrian hamsters (Fig. 6). Two groups of hamsters (n=8) were  
277 vaccinated twice with a 3-week interval with either a 20 µg dose of PTX-COVID19-B or  
278 the formulation buffer. Twenty days after boost vaccination, all hamsters were challenged  
279 intranasally with SARS-CoV-2. Body weight of the hamsters was measured 1 day before  
280 the SARS-CoV-2 challenge and then on 1, 3, 5, 7 and 8 dpi. Oral swabs were taken from  
281 the hamsters on 1, 3, 5 and 7 dpi. On 4 and 8 dpi, half (n=4) of the hamsters from each  
282 group were humanly euthanized, and nasal turbinates and lungs were collected.

283       When compared to pre-challenge, the body weight of the control hamsters  
284 decreased from 3 dpi to 8 dpi, while that of the PTX-COVID19-B vaccinated hamsters  
285 decreased slightly on 3 dpi and then increased from 4 dpi to 8 dpi (Fig. 6B). We then  
286 measured the amount of infectious virus in the respiratory tracts of the hamsters (Fig.

287 6C). No infectious SARS-CoV-2 virus was detected in the lungs of PTX-COVID19-B  
288 vaccinated hamsters on 4 dpi and 8 dpi. In the lungs of control hamsters, a large amount  
289 of infectious virus was found on 4 dpi (median TCID<sub>50</sub>=4.4×10<sup>5</sup>, IQR 2.7×10<sup>5</sup>-8.9×10<sup>5</sup>),  
290 and low levels of infectious SARS-CoV-2 virus (median TCID<sub>50</sub>=21.5, IQR 4.4-81.3)  
291 were still present in 3 out of 4 animals on 8 dpi. Infectious virus was also found in the  
292 nasal turbinates of control hamsters on 4 dpi and 8 dpi, respectively (4 dpi median  
293 TCID<sub>50</sub>=2.8×10<sup>5</sup>, IQR 4.4×10<sup>3</sup>-1.5×10<sup>6</sup>; 8 dpi median TCID<sub>50</sub>=15.8, IQR 0-50.1). No  
294 infectious virus was detected in the nasal turbinates of PTX-COVID19-B vaccinated  
295 hamsters on 4 dpi and 8 dpi except in one animal where low level (TCID<sub>50</sub>=251) was  
296 detected on 4 dpi (Fig. 6C). Similar results were observed in the oral swabs, where little  
297 or no infectious SARS-CoV-2 virus was detected in the samples of PTX-COVID19-B  
298 vaccinated hamsters but high levels of the virus were detected in control hamsters from 1  
299 dpi to 5 dpi (Fig. 6C).

300 Lung pathology was also examined in all hamsters, using a semiquantitative  
301 grading system to score the severity of the lung pathology (Fig. 6D, 6E, and Table S1).  
302 There was a significant difference in the lung pathology of control animals (n=4) and  
303 PTX-COVID19-B vaccinated animals (n=4), after challenge with SARS-CoV-2. The  
304 main histopathologic features after SARS-CoV-2 infection was extensive mixed  
305 inflammatory cell infiltration. The lung pathology was less extensive in the PTX-  
306 COVID19-B vaccinated animals, although there was individual variability in grades.

307 Taken together, these results indicate that vaccination with PTX-COVID19-B  
308 prevented productive infection of the lungs and upper respiratory tracts by SARS-CoV-2  
309 in hamsters, and protected the animals from moderate/severe lung inflammation.

310 **Safety of PTX-COVID19-B in the animals**

311 C57BL/6 mice and hamsters were checked daily during the experiments. The general  
312 status of the vaccinated animals such as appearance, feeding, and mobility was the same  
313 as the control mice.

314 Male and female BALB/c mice immunized with 4  $\mu$ g and 20  $\mu$ g doses of PTX-  
315 COVID19-B were evaluated for body weight, and injection site dermal scoring using a  
316 modified Draize scoring method (52) on days 23 and 43 (2 and 22 days after the second  
317 immunization, respectively). No differences in body weight were observed in immunized  
318 males compared to control mice. A small weight loss was observed in females compared  
319 to control animals in the week following the second injection of PTX-COVID19-B at 20  
320  $\mu$ g dose but by day 43, there was no significant difference in average body weight  
321 compared to control groups. A slight transient dermal erythema was observed in a small  
322 proportion (20%) of vaccinated mice, which disappeared by day 43. Therefore, PTX-  
323 COVID19-B intramuscular immunization in BALB/c mice was well tolerated and only  
324 mild transient effects were observed, which resolved by day 43.



## 325 **DISCUSSION**

326           The results presented here indicate that the SARS-CoV-2 mRNA vaccine, PTX-  
327 COVID19-B, is safe and effective in mouse and hamster models. PTX-COVID19-B  
328 elicited robust cellular and humoral immune responses and could completely protect  
329 vaccinated mice or hamsters from productive SARS-CoV-2 infection in the lungs.  
330 Although it is difficult to make a direct comparison due to variations in experimental  
331 conditions, the immunogenicity, such as the nominal titers of vaccine-induced nAb, and  
332 the efficacy of PTX-COVID19-B, are comparable to those reported in the small animal  
333 studies of the other two mRNA vaccines approved for emergency use in humans (32, 53).  
334           PTX-COVID19-B also prevented SARS-CoV-2 replication in the upper  
335 respiratory tracts of hamsters, as shown by little or no infectious virus detected in nasal  
336 turbinates or oral swabs. Suppression of virus replication in upper respiratory tracts can  
337 reduce transmission of respiratory viruses, but has been hard to achieve for respiratory  
338 virus vaccines, possibly due to poor performance of these vaccines in inducing mucosal  
339 immunity in upper respiratory tracts (54, 55). In this regard, some SARS-CoV-2  
340 vaccines, including one of the two approved mRNA vaccines, were shown to be capable  
341 of suppressing the virus replication in both upper and lower respiratory tract in animal  
342 studies (32, 53, 56, 57). Additional experiments are needed to confirm the upper  
343 respiratory tract findings reported here, including the examination of the mucosal  
344 immune response elicited by PTX-COVID19-B and tests to see if PTX-COVID19-B can  
345 prevent SARS-CoV-2 transmission between hamsters.  
346           PTX-COVID19-B encodes a full-length membrane-anchored S protein derived  
347 from the ancestral Wuhan-Hu-1 isolate with a D614G substitution to match the

348 predominant circulating SARS-CoV-2 strains at this amino acid location. During the  
349 preparation of this manuscript, SARS-CoV-2 VOCs emerged and have begun dominating  
350 the circulating strains worldwide, casting a doubt on the efficacy of current SARS-CoV-2  
351 vaccines (41-43). Fortunately, immune sera from human subjects receiving the other two  
352 approved mRNA vaccines have been shown to neutralize many VOCs, although usually  
353 with reduced titers, in particular for the B.1.351 lineage (9-12, 58). Consistent with these  
354 reports, PTX-COVID19-B elicited mouse immune sera were still capable of neutralizing  
355 3 dominant VOCs with high potency by a pseudovirus assay. However, further  
356 experiments are needed to test the efficacy of PTX-COVID19-B in protection of animals  
357 against VOCs' infections.

358         The 2P mutation (K986P and V987P) was reported to stabilize the ectodomain of  
359 the S protein in the prefusion conformation (17), which was regarded as crucial in  
360 inducing nAb, and thus was adopted in some SARS-CoV-2 vaccines (32, 53, 59, 60).  
361 PTX-COVID19-B does not have the 2P mutation since we thought it likely that the  
362 membrane-anchor could stabilize the full-length S in the prefusion conformation as  
363 reported for other virus envelope proteins (61-63). An additional example for the use of  
364 wild-type full-length S in a SARS-CoV-2 vaccine is ChAdOx1 nCoV-19 (AZD1222),  
365 which was reported assuming the prefusion conformation on the cell surface (64). The  
366 equivalent levels of SARS-CoV-2 nAb titers and protection from SARS-CoV-2 infection  
367 afforded by PTX-COVID19-B, as compared to those of the other two approved mRNA  
368 vaccines using the 2P mutations in their S immunogens, suggest that the 2P mutation  
369 might not be essential for induction of protective immunity (32, 53). We also designed  
370 and tested another S construct, S<sub>furinmut</sub>, in which the furin cleavage site between S1 and

371 S2 subunits was removed. Removing this site was presumed to stabilize the ectodomain  
372 of the S protein by keeping the S1 subunit from shedding from S, and was utilized in  
373 some SARS-CoV-2 vaccines (17, 59, 60). However, we did not find that the  $S_{\text{furinmut}}$   
374 mRNA performed better in eliciting nAb responses in mice compared to the S mRNA.  
375 Additional experiments are required to test if other modifications of the S protein could  
376 enhance the strength and breadth of the immunogenicity and efficacy of PTX-COVID19-  
377 B. In contrast to the S mRNA and  $S_{\text{furinmut}}$  mRNA, the RBD mRNA performed poorly in  
378 inducing a nAb response. This is consistent with previous reports showing that RBD was  
379 weakly immunogenic, possibly due to its small size (65, 66).

380 The protection mechanisms of SARS-CoV-2 vaccines have not been fully  
381 elucidated in humans, although nAbs and T cells are assumed to be critical protection  
382 correlates (47, 54, 67). This is supported by animal studies where nAb responses were  
383 pivotal in protecting monkeys from SARS-CoV-2 infection, with  $CD8^+$  T cells also  
384 participating in protection (68). In addition,  $CD4^+$  T cell help is vital for the quantity and  
385 quality of nAb and  $CD8^+$  T cell responses against virus infection (69-71). T cells could  
386 also continue to attack the VOCs that escape the nAb response, since they recognize  
387 multiple linear epitopes, including epitopes in the conserved region of the S protein (72).  
388 In this regard, PTX-COVID19-B elicited both robust nAb and  $CD8^+$  T cell responses.  
389 PTX-COVID19-B also induced a predominant Th1 response, which is regarded as a  
390 desirable feature for respiratory virus vaccines (73). Additional experiments will be  
391 required to track nAb and T cell responses induced by PTX-COVID19-B, including their  
392 durability and capability to protect against VOCs.

393           Although a few vaccines have been approved for emergency use in humans,  
394 additional safe, effective, and easily deployable SARS-CoV-2 vaccines are needed to  
395 meet the enormous challenge for the global immunization required to end the COVID-19  
396 pandemic. Based on the results reported here, PTX-COVID19-B has been authorized by  
397 Health Canada to enter a phase 1 clinical trial (ClinicalTrials.gov number:  
398 NCT04765436). Results of the clinical trial will determine if PTX-COVID19-B will enter  
399 into to the next phases of clinical trials and eventually be added into the vaccine arsenal  
400 in the global fight against the SARS-CoV-2.

## 401 **MATERIALS AND METHODS**

### 402 **Study design**

403 The objective of this study was to evaluate the immunogenicity, safety and efficacy of a  
404 SARS-CoV-2 mRNA vaccine in mice and hamsters. The sample size of mice was  
405 determined by power analysis assuming 60% protection efficacy. Due to the capacity  
406 limit in our animal facility, a total of 16 hamsters in two groups were used in this study.  
407 All animals were randomly assigned to different treatment groups. The performers  
408 measuring SARS-CoV-2 neutralization by mice sera and SARS-CoV-2 virus in mouse  
409 tissues and the pathologist examining animal pathology were blinded to the sample  
410 groupings.

### 411 **Ethics**

412 All animal work was approved by the Animal Care Committees of The University of  
413 Toronto. For studies involving human samples, written informed consent was obtained  
414 from convalescent COVID-19 patients, and samples were obtained and used according to  
415 a research ethics board (REB) approved protocol (St. Michael's Hospital REB20-044c to  
416 M.A.O.).

### 417 **Vaccine**

418 The mRNAs used in these studies encode the full-length S (amino acids 1-1273), the  
419  $S_{\text{furinmut}}$  that is the same as the full-length S except for the furin cleavage site NSPRRA  
420 (amino acids 679-684) changed to IL, or the RBD (amino acids 319-541). The amino acid  
421 sequences encoded by these mRNAs are the same as the Spike protein sequence from  
422 SARS-CoV-2 Wuhan-Hu-1 isolate, GenBank accession number: MN908947.3, except  
423 for a D614G substitution in S mRNA and  $S_{\text{furinmut}}$  mRNA. The mRNAs contains codon-

424 optimized open reading frames for the S, S<sub>furinmut</sub>, or RBD flanked by an optimized  
425 capped 5' UTR and an optimized 3' UTR followed by a poly-A tail. The mRNA was  
426 produced by *in vitro* transcription of a linear plasmid template using T7 RNA  
427 polymerase. The mRNA was purified by Providence's proprietary purification process  
428 using a series of purification steps to remove transcription enzymes, the linear DNA  
429 template and mRNA-related impurities prior to formulation. LNPs were prepared by  
430 mixing a buffered solution of mRNA with an ethanol solution of lipids (DSPC,  
431 cholesterol, PEG-lipid and ionizable lipid) following Genevant's proprietary process  
432 (Vancouver, BC, Canada). The LNPs were concentrated by tangential flow ultrafiltration  
433 and then diafiltered against an aqueous buffer system. Following a 0.2 µm filtration  
434 process, the LNPs were subjected to quality tests including RNA concentration,  
435 encapsulation efficiency, particle size, pH and osmolality.

436 **mRNA transfection of HEK293T cells and detection of the expressed immunogens**

437 S mRNA, S<sub>furinmut</sub> mRNA, and RBD mRNA were transfected into HEK293T cells using  
438 Lipofectamine® MessengerMAX™ transfection reagent (Thermo Fisher Scientific,  
439 Mississauga, ON, Canada) according to the manufacturer's protocol. Briefly, HEK293T  
440 cells cultured in DMEM-10 medium (DMEM supplemented with 10% FBS, 100U  
441 penicillin, 100µg streptomycin, and 2mM L-glutamine. DMEM was purchased from  
442 Thermo Fisher Scientific. All others were purchased from Wisent Bioproducts, St-Bruno,  
443 QC, Canada) were seeded into 6-well plates (Corning Life Sciences, Tewksbury, MA).  
444 After overnight culture, 2 µg mRNAs were diluted in 125 µl Opti-MEM (Thermo Fisher  
445 Scientific), mixed with the Lipofectamine® MessengerMAX™ transfection reagent, and  
446 then added to the cells. Twenty-four hours later, supernatant was collected from the

447 transfected cells for an in-house sandwich ELISA to detect the expressed immunogens in  
448 the supernatant. Cells were collected for the detection of the expressed immunogens on  
449 the cell surface by flow cytometry.

450 For the sandwich ELISA, Immunolon 2HB flat-bottom microtiter plates (Thermo  
451 Fisher Scientific) were coated with an RBD-specific neutralizing mAb COV2-2165  
452 (kindly provided by Dr. J.E. Crowe Jr. from Vanderbilt University Medical Center,  
453 Nashville, TN), washed, and blocked with DPBS containing 3% BSA (Sigma-Aldrich,  
454 Oakville, ON, Canada). The supernatant was then pipetted into the plates. Purified RBD  
455 protein (kindly provided by Dr. J. M. Rini, Department of Biochemistry, University of  
456 Toronto, Toronto, ON, Canada) was also added to the plates as positive control. After 2  
457 hours incubation, the plates were washed and mouse anti-S immune serum (kindly  
458 provided by Dr. J. R. Carlyle from Department of Immunology, University of Toronto,  
459 Toronto, ON, Canada) was added to the plates. After 1-hour incubation, the plates were  
460 washed and HRP-labeled goat anti-mouse IgG (SouthernBiotech, Birmingham, AL) was  
461 added. After 1-hour incubation, SureBlue TMB microwell peroxidase substrate (KPL,  
462 Gaithersburg, MD) was added and 15 minutes later, 1N HCL was pipetted into the plates  
463 to stop the reaction. OD<sub>450</sub> was then read using a microplate reader (Thermo Fisher  
464 Scientific).

465 For flow cytometry, cells were first stained with the RBD-specific neutralizing  
466 mAb COV2-2165, and then with an APC mouse anti-human IgG (BD Biosciences,  
467 Mississauga, ON, Canada). Stained cells were run on LSRFortessa (BD Biosciences).  
468 FlowJo (BD) was used to analyze the flow cytometry data.

469 **Mouse vaccination**

470 Female C57BL/6 mice of 6- to 8-week old were vaccinated intramuscularly twice with a  
471 3-week interval. In some experiments, both male and female BALB/c mice of 6- to 8-  
472 week old were used. Various doses of mRNA vaccines or control tdTomato mRNA in  
473 50 $\mu$ l total volume were injected into the hind leg muscle for each immunization. Naïve  
474 mice received the same volume of either DPBS or the vaccine formulation buffer. Each  
475 day before vaccination, blood was collected from the mice through the saphenous vein.  
476 Three weeks after boost vaccination, mice were humanly euthanized and spleen and  
477 blood samples were collected. Serum was isolated from the blood by centrifugation at  
478 10,000  $g$  for 30 seconds at 4°C.

#### 479 **S-specific immunoglobulin ELISA**

480 ELISAs were performed as previously described with minor modifications for mouse  
481 samples(74). 96-well plates (Green BioResearch, Baton Rouge, LA) were coated with  
482 200 ng/well of recombinant purified full-length spike trimer SmT1(75) and blocked with  
483 3% w/v milk powder in PBS-T. Serial dilutions of mouse samples in 1% w/v milk  
484 powder in PBS-T were added to the plate (starting at 1:100 dilution with 5-fold dilutions)  
485 and incubated for 2 hours at room temperature. Wells were then washed 3 times with  
486 200 $\mu$ L PBST before incubation for 1 hour with secondary antibodies (HRP-labeled Goat  
487 anti-mouse IgG1/IgG2b/IgG2c purchased from SouthernBiotech or HRP-labeled Goat  
488 anti-mouse IgG Fc $\gamma$  purchased from Jackson ImmunoResearch, West Grove, PA) in 1%  
489 w/v milk powder in PBS-T. Samples were washed 3 times with PBS-T and then 1-Step  
490 Ultra TMB-ELISA Substrate Solution (Thermo Fisher Scientific) was added for 15  
491 minutes at room temperature. The reaction was quenched with equal volume stop  
492 solution containing 0.16N sulfuric acid (Thermo Fisher Scientific). Plates were read



493 using a spectrophotometer (BioTek Instruments Inc., Cytation 3) reading at 450nm. All  
494 sample raw OD values had blank values subtracted before analysis. OD values of each  
495 PTX-COVID19-B vaccinated mouse serum minus average of OD values of 4 tdTomato  
496 control mouse sera at the same dilution were used to calculate EC<sub>50</sub> titer using the 4-  
497 parameter logistic regression analysis in GraphPad Prism 8 (GraphPad Software, La  
498 Jolla, CA).

#### 499 **Serum neutralization using SARS-CoV-2 virus**

500 A micro-neutralization assay was used to measure the neutralizing titers of the sera(45).  
501 Briefly, VeroE6 cells cultured in DMEM-10 were seeded into 96-well plates and cultured  
502 overnight. Sera were heat-inactivated at 56°C for 30 minutes. Serial dilutions of the sera  
503 were mixed with 100 TCID<sub>50</sub> SARS-CoV-2 virus (isolate SARS-CoV-2-SB2-P3 PB  
504 Clone 1, passage 3(40)) in serum free DMEM, incubated at 37°C for 1 hour, and then  
505 added onto the VeroE6 cells. The cell plates were then incubated at 37°C for 1 hour,  
506 shaking every 15 minutes. Inoculums were then removed and DMEM-2 (DMEM  
507 supplemented with 2% FBS, 100U penicillin, 100µg streptomycin, and 2mM L-  
508 glutamine) was added to the cells. Cell plates were incubated at 37°C for 5 days and  
509 cytopathic effect (CPE) was checked every day. 50% neutralization titer (ID<sub>50</sub>) was  
510 defined as the highest dilution factor of the serum that protected 50% of the cells from  
511 CPE and calculated by using the 4-parameter logistic regression analysis in GraphPad  
512 Prism 8. The performer of the assay was blinded to the grouping of the mice.

#### 513 **Serum neutralization using pseudovirus**

514 Spike-pseudotyped lentiviral assays were performed as previously described with  
515 reagents kindly provided by Dr. J. D. Bloom (Department of Genome Sciences,

516 University of Washington, Seattle, WA) and with minor modifications for mouse  
517 samples(74). Briefly, Spike-pseudotyped lentivirus particles (both wild-type Wuhan-Hu-  
518 1 and tested VOCs) were generated and used at ~1:25 virus stock dilution (a virus  
519 dilution resulting in >1000 relative luciferase units (RLU) over control). For the  
520 neutralization assay, diluted mouse sera (1:40 from stock sera) were serially diluted (from  
521 2.5 to 4-fold dilutions over 7 dilutions to encompass a complete neutralization curve per  
522 sample) and incubated with diluted pseudovirus at a 1:1 ratio for 1 hour at 37°C before  
523 being transferred to plated HEK293T-ACE2/TMPRSS2 cells and incubated for an  
524 additional 48 hours at 37°C and 5% CO<sub>2</sub>. After 48 hours, cells were lysed, and Bright-  
525 Glo luciferase reagent (Promega, Madison, WI) was added for 2 minutes before reading  
526 with a PerkinElmer Envision instrument (PerkinElmer, Waltham, MA). 50%  
527 neutralization titer (ID<sub>50</sub>) were calculated with nonlinear regression (log[inhibitor] versus  
528 normalized response – variable slope) using GraphPad Prism 8. The assay was performed  
529 in the same manner for all VOCs tested. The performer of the assay was blinded to the  
530 grouping of the mice.

531 **ELISPOT assay:** To perform IFN- $\gamma$  ELISPOT for C57BL/6 mice, ELISPOT plates  
532 (Sigma-Aldrich) were coated with rat anti-mouse IFN- $\gamma$  antibody (BD Bioscience)  
533 overnight. Plates were washed and blocked with RPMI-10 medium (RPMI-1640  
534 supplemented with 10% FBS, 100U penicillin, 100 $\mu$ g streptomycin, and 2mM L-  
535 glutamine. All were purchased from Wisent Bioproducts) for 2 hours. Splenocytes were  
536 added into the plates, and stimulated with a SARS-CoV-2 S peptide pool (15-mer  
537 peptides with 11 amino acids overlap covering the full-length S, total 315 peptides, JPT  
538 Peptide Technologies GmbH, Berlin, Germany) at 1  $\mu$ g/ml/peptide. The same volume of

539 40% DMSO (Sigma-Aldrich), the solution to dissolve the peptide pool, was used as the  
540 negative control. PMA/Ionomycin (Sigma-Aldrich) was used as the positive control.  
541 After overnight incubation, the cells were washed away, and biotinylated anti-mouse  
542 IFN- $\gamma$  (BD) was added, and the plates were incubated for 2 hours. After washing with  
543 PBS/0.01% Tween 20, Streptavidin-HRP enzyme conjugate (Thermo Fisher Scientific)  
544 was added into the plates, which was incubated for 1 hour. After washing with  
545 PBS/0.01% Tween 20, TMB ELISPOT substrate (Mabtech, Cincinnati, OH) was added  
546 into the plates, and the spots were developed and read with an ImmunoSpot® Analyzer  
547 (Cellular Technology Limited, Cleveland, OH). The number of the S-specific spots was  
548 acquired by subtracting the number of the spots of the DMSO control wells from the  
549 number of the spots of the corresponding S peptide pool stimulation wells.

550 For IFN- $\gamma$  and IL-4 ELISPOT of BALB/c mice, similar procedures as described  
551 above were performed using ImmunoSpot® Mouse IFN-  $\gamma$  and IL-4 ELISPOT kit (CTL,  
552 Shaker Heights, OH), with modifications according to the manufacturer's protocol.  
553 Splenocytes were stimulated with two subpools (158 and 157 peptides, respectively) of  
554 the JPT's SARS-CoV-2 S peptide pool separately. The number of the S-specific spots  
555 was acquired by adding up the numbers of the spots in each subpool-stimulated  
556 splenocytes minus the number of the spots of the DMSO control wells.

#### 557 **T cell intracellular cytokine staining**

558 Mouse splenocytes were cultured in RPMI-10 and stimulated with the S peptide pool at 1  
559  $\mu\text{g/ml/peptide}$  in the presence of GolgiStop™ and GolgiPlug™ (BD) for 6 hours. 40%  
560 DMSO and PMA/Ionomycin was used as the negative and positive control, respectively.  
561 Cells were first stained with the LIVE/DEAD™ Fixable Violet Dead Cell Stain, blocked

562 the FcR with the TruStain FcX (Biolegend, San Diego, CA) and then stained with the  
563 fluorochrome-labeled anti-mouse CD3/CD4/CD8/CD44/CD62L mAbs (all purchased  
564 from Biolegend except CD44 from BD). Cells were then treated with Cytofix/Cytoperm  
565 (BD) and stained with fluorochrome-labeled anti-mouse IFN- $\gamma$ /TNF- $\alpha$ /IL-2/IL-4/IL-5  
566 mAbs (Biolegend). LSRFortessa was used to acquire the flow cytometry data, which  
567 were then analyzed with FlowJo. Percentage of cytokine<sup>+</sup> T cells was calculated by  
568 subtracting the percentage of the DMSO control cells from the percentage of the  
569 corresponding S peptide pool stimulation cells.

#### 570 **Multiplex immunoassay**

571 Supernatant from the mouse splenocytes stimulated with the S peptide pool at 1  
572  $\mu\text{g/ml/peptide}$  for 24 hours was collected and cytokines were detected using a multiplex  
573 capture sandwich immunoassay. Bio-Plex Pro™ mouse cytokine Th1/Th2 assay kit  
574 (Bio-Rad, Mississauga, ON, Canada) was used. Both standards and samples were  
575 prepared following manufacturer's instructions. The assay plate was read in a Bio-Plex  
576 MAGPIX system (Bio-Rad) and data were analyzed using the Bio-Plex Manager  
577 Software (Bio-Rad).

#### 578 **SARS-CoV-2 mouse challenge**

579 Mice were anesthetized with isoflurane and intranasally transduced with  $10^{11}$  genomic  
580 copies of the AAV6-hACE2 or in some experiments AAV6-luciferase as control (kindly  
581 provided by Dr. S. K. Wootton, Department of Pathobiology, University of Guelph,  
582 Guelph, ON, Canada). Nine days later, the mice were anesthetized with isoflurane and  
583 intranasally challenged with  $10^5$  TCID<sub>50</sub> SARS-CoV-2 (SARS-CoV-2, isolate  
584 Canada/ON/VIDO-01/2020, GISAID accession number: EPI\_ISL\_425177). On 4dpi,

585 mice were humanly euthanized and blood and lungs were collected. For each mouse, the  
586 left lung was sent for pathology examination, and the right lung was homogenized in  
587 DMEM-2, using a Bead Mill Homogenizer (OMNI International, Kennesaw GA). Lung  
588 homogenates were then clarified by centrifugation at 10,000 rpm for 5 minutes.

### 589 **Hamster vaccination and SARS-CoV-2 challenge**

590 Male Syrian hamsters, aged 6 to 10 weeks, were obtained from Charles River Canada  
591 (Saint-Constant, QC, Canada). The animals were kept in Biosafety Level-2 housing until  
592 virus challenge in Biosafety Level-3 *in vivo* facility. A total of 2 groups of 16 animals  
593 (n=8/group) were immunized twice with a 3-week interval with 20 $\mu$ g of PTX-COVID19-  
594 B in 100  $\mu$ l via intramuscular route into rear limbs (50  $\mu$ l/limb). Mock animal group  
595 received an equivalent volume of phosphate-buffered saline (PBS). Three weeks post  
596 boost, animals were intranasally challenged with SARS-CoV-2 (1 x 10<sup>4</sup> TCID<sub>50</sub> in 100  $\mu$ l  
597 per animal) under inhaled isoflurane anesthesia. Animals were monitored daily for  
598 clinical signs of disease and phenotype parameters such as weight loss and body  
599 temperature was recorded every second day. No death was recorded after the viral  
600 infection.

601 Four animals in both challenged group were humanly euthanized at 4 and 8 dpi  
602 for virological and histopathological analyses. Blood and major organ tissues were  
603 collected, and the tissues were separated into 2 parts, one part immediately fixed in 10%  
604 formalin, and the other part immediately frozen at -80°C until further use. The frozen  
605 tissue samples were homogenized in 1 ml DMEM-2 manually in a disposable 15 ml  
606 closed Tissue Grinder System (Thermo Fisher Scientific). 140  $\mu$ l out of 1ml samples  
607 were used for RNA extraction while 500  $\mu$ l of homogenates were used for quantification

608 of SARS-CoV-2. For oral swabs, anesthetized animals were swabbed (9-11 seconds  
609 swabbing) and swabs were then introduced into 1ml DMEM-2. All oral swab samples  
610 were frozen until further processing. 500 µl of each oral swab sample was used for  
611 quantification of SARS-CoV-2.

#### 612 **Determination of infectious SARS-CoV-2 titer**

613 VeroE6 cells cultured in DMEM-10 were seeded into 96-well plates and incubated  
614 overnight at 37°C. On the following day culture medium was removed and tissue  
615 samples 10-fold serially diluted in DMEM supplemented with 1% FBS were added onto  
616 the cells. The plates were then incubated at 37°C for 1hour. After incubation lung  
617 homogenates were replaced with 100µl/well DMEM-2, and the cells were incubated at  
618 37°C for 5 days. Cytopathic effect (CPE) was checked on day 3 and day 5. TCID<sub>50</sub> was  
619 defined as the highest dilution factor of the inoculum that yielded 50% of the cells with  
620 CPE and determined by using the Spearman-Kärber TCID<sub>50</sub> method.

#### 621 **Real-time RT-PCR**

622 Real-time RT-PCR to quantify the genomic copies of SARS-CoV-2 in tissue  
623 homogenates was done according to the published protocol(40). Briefly, RNA was  
624 isolated from the tissue homogenates using QIAamp viral RNA kit (QIAGEN, Toronto,  
625 ON, Canada). Luna Universal Probe One-step RT-qPCR kit (New England Biolabs,  
626 Ipswich, MA) was used to amplify the envelope (E) gene using the following primers and  
627 probes: forward primer: ACAGGTACGTTAATAGTTAATAGCGT, reverse primer:  
628 ATATTGCAGCAGTACGCACACA, and probe CAL Fluor Orange 560-  
629 AACTAGCCATCCTTACTGCGCTTCG-BHQ-1. The cycling conditions were 1 cycle  
630 at 60°C for 10 minutes, then 95°C for 2 minutes, followed by 44 cycles at 95°C for 10

631 seconds and 60°C for 15 seconds. An E gene DNA standard (pUC57-2019-nCoV-PC:E,  
632 GenScript, Piscataway, NJ) was also run at the same time for conversion of Ct value to  
633 genomic copies, by using the Rotor-Gene Q software (QIAGEN).

#### 634 **Pathology**

635 The formalin-fixed lung tissue was processed for paraffin embedding, microtomy and  
636 then stained with hematoxylin and eosin. The blocks were examined at 3 separate levels  
637 (3 separate slides). Histological sections were examined blind to vaccination status.  
638 Semiquantitative grading of lung was conducted according to Table S1.

#### 639 **Statistical analysis**

640 One-way ANOVA (Kruskal-Wallis test) followed by Dunn's multiple comparison, two-  
641 way ANOVA followed by Sidak's multiple comparison, two-tailed paired t test, or two-  
642 tailed unpaired t test (Mann-Whitney) were used for comparison between groups, as  
643 indicated in the figure legends. Spearman correlation test was used for correlation  
644 analysis. Logistic regression was used for determining nAb ID<sub>50</sub> threshold titer that  
645 would confer 95% predicted probability of protection from productive SARS-CoV-2  
646 infection in mice. All statistical analysis was performed by using GraphPad Prism 8.  
647  $P < 0.05$  was regarded as statistically significant.

#### 648 **Supplementary Materials**

649 **Fig. S1. Expression of the SARS-CoV-2 mRNA vaccine candidates *in vitro*.**

650 **Fig. S2. Flow cytometry analysis of the mouse cellular immune response elicited by**  
651 **PTX-COVID19-B.**

652 **Fig. S3. AAV6-hACE2 mouse model.**

653 **Fig. S4. Correlation of protection afforded by PTX-COVID19-B with titers of**  
654 **neutralizing antibody against SARS-CoV-2 authentic virus.**

655 **Table S1. Lung pathology semiquantitative grading criteria.**

656

657



## 658 References and Notes

- 659 1. E. Dong, H. Du, L. Gardner, An interactive web-based dashboard to track  
660 COVID-19 in real time. *The Lancet. Infectious diseases* **20**, 533-534 (2020).
- 661 2. J. H. Beigel *et al.*, Remdesivir for the Treatment of Covid-19 - Final Report. *The*  
662 *New England journal of medicine* **383**, 1813-1826 (2020).
- 663 3. P. Chen *et al.*, SARS-CoV-2 Neutralizing Antibody LY-CoV555 in Outpatients  
664 with Covid-19. *The New England journal of medicine* **384**, 229-237 (2021).
- 665 4. P. Horby *et al.*, Dexamethasone in Hospitalized Patients with Covid-19. *The New*  
666 *England journal of medicine* **384**, 693-704 (2021).
- 667 5. M. J. Joyner *et al.*, Convalescent Plasma Antibody Levels and the Risk of Death  
668 from Covid-19. *The New England journal of medicine*, (2021).
- 669 6. D. M. Weinreich *et al.*, REGN-COV2, a Neutralizing Antibody Cocktail, in  
670 Outpatients with Covid-19. *The New England journal of medicine* **384**, 238-251  
671 (2021).
- 672 7. L. S. o. H. T. Medicine.
- 673 8. W. H. Organization. (2021), vol. 2021.
- 674 9. Y. Liu *et al.*, Neutralizing Activity of BNT162b2-Elicited Serum - Preliminary  
675 Report. *The New England journal of medicine*, (2021).
- 676 10. T. Tada *et al.*, Neutralization of viruses with European, South African, and United  
677 States SARS-CoV-2 variant spike proteins by convalescent sera and BNT162b2  
678 mRNA vaccine-elicited antibodies. *bioRxiv : the preprint server for biology*,  
679 (2021).
- 680 11. Z. Wang *et al.*, mRNA vaccine-elicited antibodies to SARS-CoV-2 and  
681 circulating variants. *Nature*, (2021).
- 682 12. K. Wu *et al.*, Serum Neutralizing Activity Elicited by mRNA-1273 Vaccine -  
683 Preliminary Report. *The New England journal of medicine*, (2021).
- 684 13. L. Corey, J. R. Mascola, A. S. Fauci, F. S. Collins, A strategic approach to  
685 COVID-19 vaccine R&D. *Science (New York, N.Y.)* **368**, 948-950 (2020).
- 686 14. B. Coutard *et al.*, The spike glycoprotein of the new coronavirus 2019-nCoV  
687 contains a furin-like cleavage site absent in CoV of the same clade. *Antiviral*  
688 *research* **176**, 104742 (2020).
- 689 15. M. Hoffmann *et al.*, SARS-CoV-2 Cell Entry Depends on ACE2 and TMPRSS2  
690 and Is Blocked by a Clinically Proven Protease Inhibitor. *Cell* **181**, 271-280.e278  
691 (2020).
- 692 16. A. C. Walls *et al.*, Structure, Function, and Antigenicity of the SARS-CoV-2  
693 Spike Glycoprotein. *Cell* **181**, 281-292.e286 (2020).
- 694 17. D. Wrapp *et al.*, Cryo-EM structure of the 2019-nCoV spike in the prefusion  
695 conformation. *Science (New York, N.Y.)* **367**, 1260-1263 (2020).
- 696 18. F. Wu *et al.*, A new coronavirus associated with human respiratory disease in  
697 China. *Nature* **579**, 265-269 (2020).
- 698 19. P. Zhou *et al.*, A pneumonia outbreak associated with a new coronavirus of  
699 probable bat origin. *Nature* **579**, 270-273 (2020).
- 700 20. M. Hoffmann, H. Kleine-Weber, S. Pöhlmann, A Multibasic Cleavage Site in the  
701 Spike Protein of SARS-CoV-2 Is Essential for Infection of Human Lung Cells.  
702 *Molecular cell* **78**, 779-784.e775 (2020).

- 703 21. T. P. Peacock *et al.*, The furin cleavage site of SARS-CoV-2 spike protein is a  
704 key determinant for transmission due to enhanced replication in airway cells.  
705 *bioRxiv : the preprint server for biology*, (2020).
- 706 22. B. A. Johnson *et al.*, Loss of furin cleavage site attenuates SARS-CoV-2  
707 pathogenesis. *Nature*, (2021).
- 708 23. C. O. Barnes *et al.*, SARS-CoV-2 neutralizing antibody structures inform  
709 therapeutic strategies. *Nature* **588**, 682-687 (2020).
- 710 24. P. J. M. Brouwer *et al.*, Potent neutralizing antibodies from COVID-19 patients  
711 define multiple targets of vulnerability. *Science (New York, N.Y.)* **369**, 643-650  
712 (2020).
- 713 25. B. Ju *et al.*, Human neutralizing antibodies elicited by SARS-CoV-2 infection.  
714 *Nature* **584**, 115-119 (2020).
- 715 26. L. Liu *et al.*, Potent neutralizing antibodies against multiple epitopes on SARS-  
716 CoV-2 spike. *Nature* **584**, 450-456 (2020).
- 717 27. D. F. Robbiani *et al.*, Convergent antibody responses to SARS-CoV-2 in  
718 convalescent individuals. *Nature* **584**, 437-442 (2020).
- 719 28. T. F. Rogers *et al.*, Isolation of potent SARS-CoV-2 neutralizing antibodies and  
720 protection from disease in a small animal model. *Science (New York, N.Y.)* **369**,  
721 956-963 (2020).
- 722 29. R. Shi *et al.*, A human neutralizing antibody targets the receptor-binding site of  
723 SARS-CoV-2. *Nature* **584**, 120-124 (2020).
- 724 30. S. J. Zost *et al.*, Potently neutralizing and protective human antibodies against  
725 SARS-CoV-2. *Nature* **584**, 443-449 (2020).
- 726 31. J. Gergen, B. Petsch, mRNA-Based Vaccines and Mode of Action. *Current topics*  
727 *in microbiology and immunology*, (2021).
- 728 32. K. S. Corbett *et al.*, SARS-CoV-2 mRNA vaccine design enabled by prototype  
729 pathogen preparedness. *Nature* **586**, 567-571 (2020).
- 730 33. L. R. Baden *et al.*, Efficacy and Safety of the mRNA-1273 SARS-CoV-2  
731 Vaccine. *The New England journal of medicine* **384**, 403-416 (2021).
- 732 34. F. P. Polack *et al.*, Safety and Efficacy of the BNT162b2 mRNA Covid-19  
733 Vaccine. *The New England journal of medicine* **383**, 2603-2615 (2020).
- 734 35. B. Korber *et al.*, Tracking Changes in SARS-CoV-2 Spike: Evidence that D614G  
735 Increases Infectivity of the COVID-19 Virus. *Cell* **182**, 812-827.e819 (2020).
- 736 36. A. C. Walls *et al.*, Cryo-electron microscopy structure of a coronavirus spike  
737 glycoprotein trimer. *Nature* **531**, 114-117 (2016).
- 738 37. M. A. Tortorici *et al.*, Structural basis for human coronavirus attachment to sialic  
739 acid receptors. *Nature structural & molecular biology* **26**, 481-489 (2019).
- 740 38. A. G. Wrobel *et al.*, SARS-CoV-2 and bat RaTG13 spike glycoprotein structures  
741 inform on virus evolution and furin-cleavage effects. *Nature structural &*  
742 *molecular biology* **27**, 763-767 (2020).
- 743 39. X. Yang *et al.*, Modifications that stabilize human immunodeficiency virus  
744 envelope glycoprotein trimers in solution. *Journal of virology* **74**, 4746-4754  
745 (2000).
- 746 40. A. Banerjee *et al.*, Isolation, Sequence, Infectivity, and Replication Kinetics of  
747 Severe Acute Respiratory Syndrome Coronavirus 2. *Emerging infectious diseases*  
748 **26**, 2054-2063 (2020).

- 749 41. P. H. England. (2020), vol. 2021.
- 750 42. H. Tegally *et al.*, Detection of a SARS-CoV-2 variant of concern in South Africa.  
751 *Nature* **592**, 438-443 (2021).
- 752 43. N. R. Faria *et al.*, Genomics and epidemiology of the P.1 SARS-CoV-2 lineage in  
753 Manaus, Brazil. *Science (New York, N.Y.)*, (2021).
- 754 44. J. R. Habel *et al.*, Suboptimal SARS-CoV-2-specific CD8(+) T cell response  
755 associated with the prominent HLA-A\*02:01 phenotype. *Proceedings of the*  
756 *National Academy of Sciences of the United States of America* **117**, 24384-24391  
757 (2020).
- 758 45. J. C. Law *et al.*, Systematic Examination of Antigen-Specific Recall T Cell  
759 Responses to SARS-CoV-2 versus Influenza Virus Reveals a Distinct  
760 Inflammatory Profile. *Journal of immunology (Baltimore, Md. : 1950)* **206**, 37-50  
761 (2021).
- 762 46. G. Breton *et al.*, Persistent cellular immunity to SARS-CoV-2 infection. *The*  
763 *Journal of experimental medicine* **218**, (2021).
- 764 47. A. T. Tan *et al.*, Early induction of functional SARS-CoV-2-specific T cells  
765 associates with rapid viral clearance and mild disease in COVID-19 patients. *Cell*  
766 *reports* **34**, 108728 (2021).
- 767 48. A. Bonifacius *et al.*, COVID-19 immune signatures reveal stable antiviral T cell  
768 function despite declining humoral responses. *Immunity* **54**, 340-354.e346 (2021).
- 769 49. B. Israelow *et al.*, Mouse model of SARS-CoV-2 reveals inflammatory role of  
770 type I interferon signaling. *The Journal of experimental medicine* **217**, (2020).
- 771 50. J. F. Chan *et al.*, Simulation of the Clinical and Pathological Manifestations of  
772 Coronavirus Disease 2019 (COVID-19) in a Golden Syrian Hamster Model:  
773 Implications for Disease Pathogenesis and Transmissibility. *Clinical infectious*  
774 *diseases : an official publication of the Infectious Diseases Society of America* **71**,  
775 2428-2446 (2020).
- 776 51. S. F. Sia *et al.*, Pathogenesis and transmission of SARS-CoV-2 in golden  
777 hamsters. *Nature* **583**, 834-838 (2020).
- 778 52. J. Draize, G. Woodard, H. Calevery, Methods for the study of irritation and  
779 toxicity of substances applied topically to the skin and mucous membranes. .  
780 *Journal of pharmacology and Experimental therapeutics* **82**, 14 (1944).
- 781 53. A. B. Vogel *et al.*, BNT162b vaccines protect rhesus macaques from SARS-CoV-  
782 2. *Nature*, (2021).
- 783 54. F. Krammer, SARS-CoV-2 vaccines in development. *Nature* **586**, 516-527  
784 (2020).
- 785 55. K. Subbarao, B. R. Murphy, A. S. Fauci, Development of effective vaccines  
786 against pandemic influenza. *Immunity* **24**, 5-9 (2006).
- 787 56. K. S. Corbett *et al.*, Evaluation of the mRNA-1273 Vaccine against SARS-CoV-2  
788 in Nonhuman Primates. *The New England journal of medicine* **383**, 1544-1555  
789 (2020).
- 790 57. M. Guebre-Xabier *et al.*, NVX-CoV2373 vaccine protects cynomolgus macaque  
791 upper and lower airways against SARS-CoV-2 challenge. *Vaccine* **38**, 7892-7896  
792 (2020).
- 793 58. A. Muik *et al.*, Neutralization of SARS-CoV-2 lineage B.1.1.7 pseudovirus by  
794 BNT162b2 vaccine-elicited human sera. *Science (New York, N.Y.)*, (2021).

- 795 59. C. Keech *et al.*, Phase 1-2 Trial of a SARS-CoV-2 Recombinant Spike Protein  
796 Nanoparticle Vaccine. *The New England journal of medicine* **383**, 2320-2332  
797 (2020).
- 798 60. J. Sadoff *et al.*, Interim Results of a Phase 1-2a Trial of Ad26.COV2.S Covid-19  
799 Vaccine. *The New England journal of medicine*, (2021).
- 800 61. J. H. Lee, G. Ozorowski, A. B. Ward, Cryo-EM structure of a native, fully  
801 glycosylated, cleaved HIV-1 envelope trimer. *Science (New York, N.Y.)* **351**,  
802 1043-1048 (2016).
- 803 62. D. M. McCraw *et al.*, Structural analysis of influenza vaccine virus-like particles  
804 reveals a multicomponent organization. *Scientific reports* **8**, 10342 (2018).
- 805 63. M. S. A. Gilman *et al.*, Transient opening of trimeric prefusion RSV F proteins.  
806 *Nature communications* **10**, 2105 (2019).
- 807 64. Y. Watanabe *et al.*, Native-like SARS-CoV-2 spike glycoprotein expressed by  
808 ChAdOx1 nCoV-19/AZD1222 vaccine. *bioRxiv : the preprint server for biology*,  
809 (2021).
- 810 65. A. C. Walls *et al.*, Elicitation of Potent Neutralizing Antibody Responses by  
811 Designed Protein Nanoparticle Vaccines for SARS-CoV-2. *Cell* **183**, 1367-  
812 1382.e1317 (2020).
- 813 66. H. X. Tan *et al.*, Immunogenicity of prime-boost protein subunit vaccine  
814 strategies against SARS-CoV-2 in mice and macaques. *Nature communications*  
815 **12**, 1403 (2021).
- 816 67. C. Rydzynski Moderbacher *et al.*, Antigen-Specific Adaptive Immunity to SARS-  
817 CoV-2 in Acute COVID-19 and Associations with Age and Disease Severity. *Cell*  
818 **183**, 996-1012.e1019 (2020).
- 819 68. K. McMahan *et al.*, Correlates of protection against SARS-CoV-2 in rhesus  
820 macaques. *Nature* **590**, 630-634 (2021).
- 821 69. S. Bedoui, W. R. Heath, S. N. Mueller, CD4(+) T-cell help amplifies innate  
822 signals for primary CD8(+) T-cell immunity. *Immunological reviews* **272**, 52-64  
823 (2016).
- 824 70. A. Ciurea, L. Hunziker, P. Klenerman, H. Hengartner, R. M. Zinkernagel,  
825 Impairment of CD4(+) T cell responses during chronic virus infection prevents  
826 neutralizing antibody responses against virus escape mutants. *The Journal of*  
827 *experimental medicine* **193**, 297-305 (2001).
- 828 71. S. Crotty, T Follicular Helper Cell Biology: A Decade of Discovery and Diseases.  
829 *Immunity* **50**, 1132-1148 (2019).
- 830 72. A. D. Redd *et al.*, CD8+ T cell responses in COVID-19 convalescent individuals  
831 target conserved epitopes from multiple prominent SARS-CoV-2 circulating  
832 variants. *medRxiv : the preprint server for health sciences*, (2021).
- 833 73. T. J. Ruckwardt, K. M. Morabito, B. S. Graham, Immunological Lessons from  
834 Respiratory Syncytial Virus Vaccine Development. *Immunity* **51**, 429-442 (2019).
- 835 74. K. T. Abe *et al.*, A simple protein-based surrogate neutralization assay for SARS-  
836 CoV-2. *JCI insight* **5**, (2020).
- 837 75. M. Stuible *et al.*, Rapid, high-yield production of full-length SARS-CoV-2 spike  
838 ectodomain by transient gene expression in CHO cells. *Journal of biotechnology*  
839 **326**, 21-27 (2021).
- 840

841 **Acknowledgements:**

842 We thank Drs. J.D. Bloom, J. R. Carlyle, J.E. Crowe Jr., J. M. Rini, and S. K. Wootton  
843 for providing reagents, Drs. S. Gray-Owen and N. Christie for their help in BSL-3 work,  
844 Dr. J. LaPierre, Mses. T. McCook, J. Kontogiannis, V. Chan, S. Johnson, L. Kent, J.  
845 Suarez, Mrs. F. Giuliano and J. Reid for mouse maintenance, vaccination and sampling,  
846 Mses. A. Fong and A. Antenucci for their help in pathology, Ms. M. Sharma for her help  
847 in multiplex immunoassay and Dr. B.H. Barber for helpful discussions. We thank and  
848 acknowledge the full team at Providence Therapeutics for its work on developing this  
849 vaccine and the team at Genevant Sciences for formulation of the vaccines used in these  
850 animal studies.

851 **Funding:** This work was funded by the National Research Council of Canada–Industrial  
852 Research Assistance Program (NRC-IRAP) to Providence Therapeutics Holdings, Inc.  
853 Canadian Institutes of Health Research (MAO)  
854 Ontario HIV Treatment Network (MAO)  
855 Li Ka Shing Knowledge Institute (MAO)  
856 Juan and Stefania fund for COVID-19 and other virus infections (MAO)  
857 Canadian Institutes of Health Research VRI-172711 (ACG)  
858 Canadian Institutes of Health Research, Canada Research Chair, Tier 1, in Functional  
859 Proteomics (ACG)  
860 Krembil Foundation and Royal Bank of Canada to the Sinai Health System Foundation  
861 (ACG)  
862 Canadian Institutes of Health Research (KM)  
863 Canadian Institutes of Health Research (AB)

864

865 Natural Sciences and Engineering Research Council of Canada (AB)

866 **Author contributions:**

867 Conceptualization: JL, JAA, JAS, NMO, EGM, MAO

868 Methodology: JL, PB, RS, BG, GB, KC, JAA, JAS, AB, KM, SM, RAK, MSP, NMO, A-

869 CG, EG, MAO

870 Investigation: JL, PB, RS, BG, GB, BR, JAA, RL, LY, SKA, SC, MN, YA, QH, MSP

871 Visualization: JL, PB, RS, KC, JAS, YA, AH, MSP, NMO

872 Funding acquisition: SM, RAK, NMO, A-CG, EGM, MAO

873 Supervision: SM, RAK, NMO, A-CG, EGM, MAO

874 Writing – original draft: JL

875 Writing – review & editing: All authors

876 **Competing interests:** MAO, RAK, SM and A-CG receive funds from a research contract

877 with Providence Therapeutics Holdings, Inc. EGM is a co-founder of Providence

878 Therapeutics Holdings, Inc. JAA was, and JAS, YA, NMO are employees of Providence

879 Therapeutics Holdings, Inc. JAA, YA, NMO and EGM are inventors on patents and

880 patent applications on SARS-CoV-2 mRNA vaccines. All other authors declare that they

881 have no competing interests.

882 **Data and materials availability:** All data are available in the main text or the

883 supplementary material. Materials are available under a material transfer agreement.

## Figures

**Fig. 1**

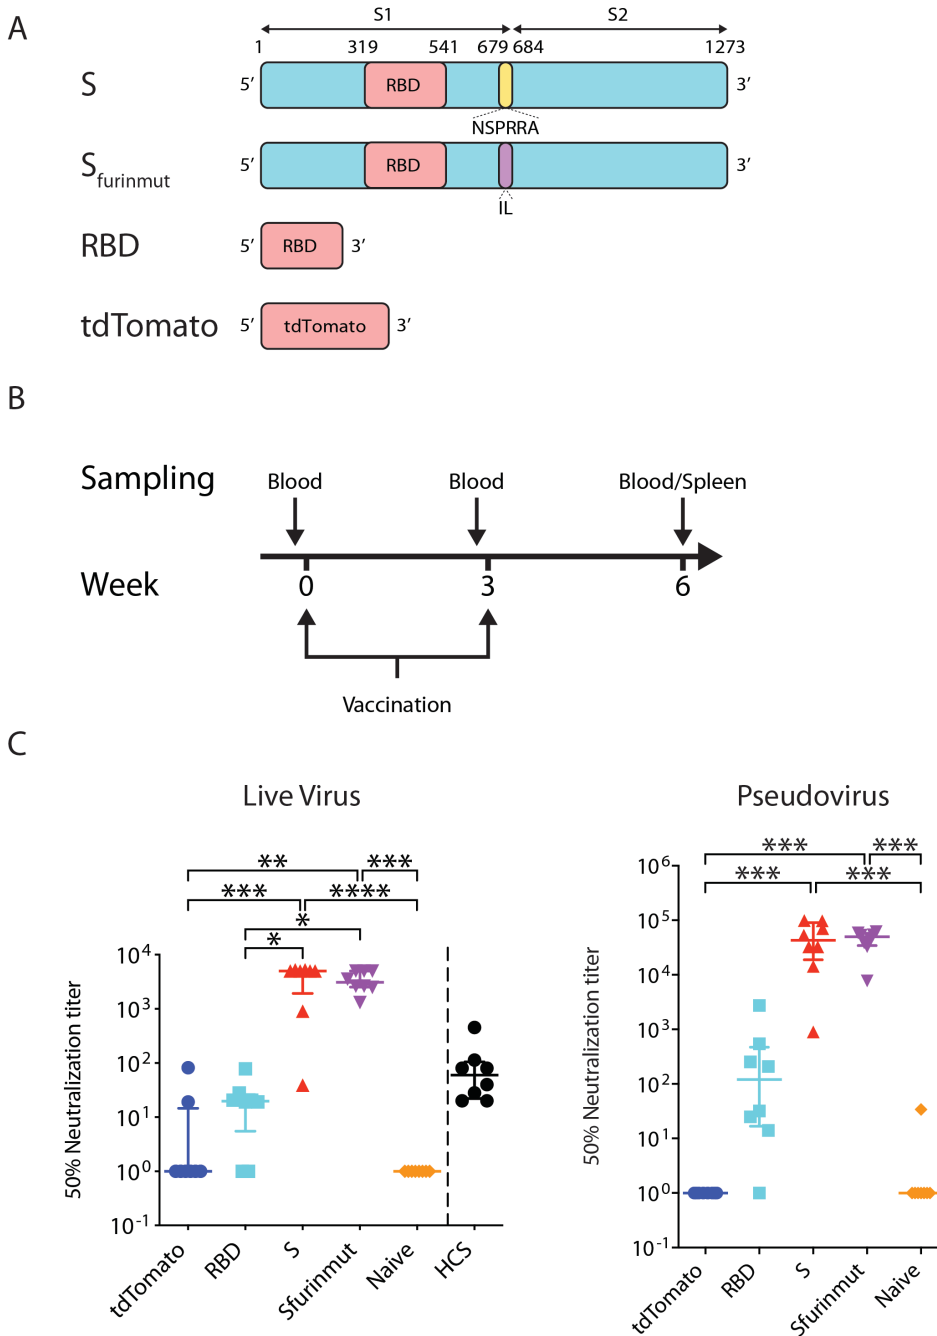

**Figure 1. SARS-CoV-2 mRNA vaccine candidates elicits SARS-CoV-2 neutralizing antibodies in mice. (A)** Schematic representation of the mRNA vaccine constructs. S: SARS-CoV-2 Spike mRNA (amino acids 1-1273). S<sub>furinmut</sub>: SARS-CoV-2 Spike mRNA

(amino acids 1-1273) in which the furin cleavage site was removed by replacing NSPRRA (amino acids 679-684) with IL. RBD: SARS-CoV-2 RBD (receptor binding domain) mRNA (amino acids 319-541). tdTomato: control mRNA encoding tdTomato. S1: S1 subunit of SARS-CoV-2 Spike (amino acids 1-685). S2: S2 subunit of SARS-CoV-2 Spike (amino acids 686-1273). **(B)** Mice vaccination regimen. Six- to 8-week old mice were vaccinated twice with a 3-week interval. One day before each vaccination, peripheral blood was collected from the mice. Three weeks after the second vaccination, mice were humanly euthanized and blood and spleens were collected from the mice. **(C)** C57BL/6 mice (n=8 per group) were vaccinated with 20 $\mu$ g of mRNA vaccine candidates (S, S<sub>furinmut</sub>, RBD) or control mRNA tdTomato or DPBS for naïve control mice. Three weeks after the second vaccination, blood was collected to test neutralization of SARS-CoV-2 authentic virus or pseudovirus by the sera. For comparison, convalescent sera from 8 SARS-CoV-2 infected human subjects (HCS in the graph) were also tested for neutralization of SARS-CoV-2 authentic virus. Each symbol represents one mouse or person. Samples that did not neutralize viruses at the lowest dilution (1:20 for real virus, 1:40 for pseudovirus) are designated a 50% neutralization titer of 1. For each group, the long horizontal line indicates the median and the short lines below and above the median indicate the 25% and 75% percentile. \*:  $P < 0.05$ , \*\*:  $P < 0.01$ , \*\*\*:  $P < 0.001$ , \*\*\*\*:  $P < 0.0001$  as determined by one way ANOVA (Kruskal-Wallis test) followed by Dunn's multiple comparison test.



**Fig. 2**

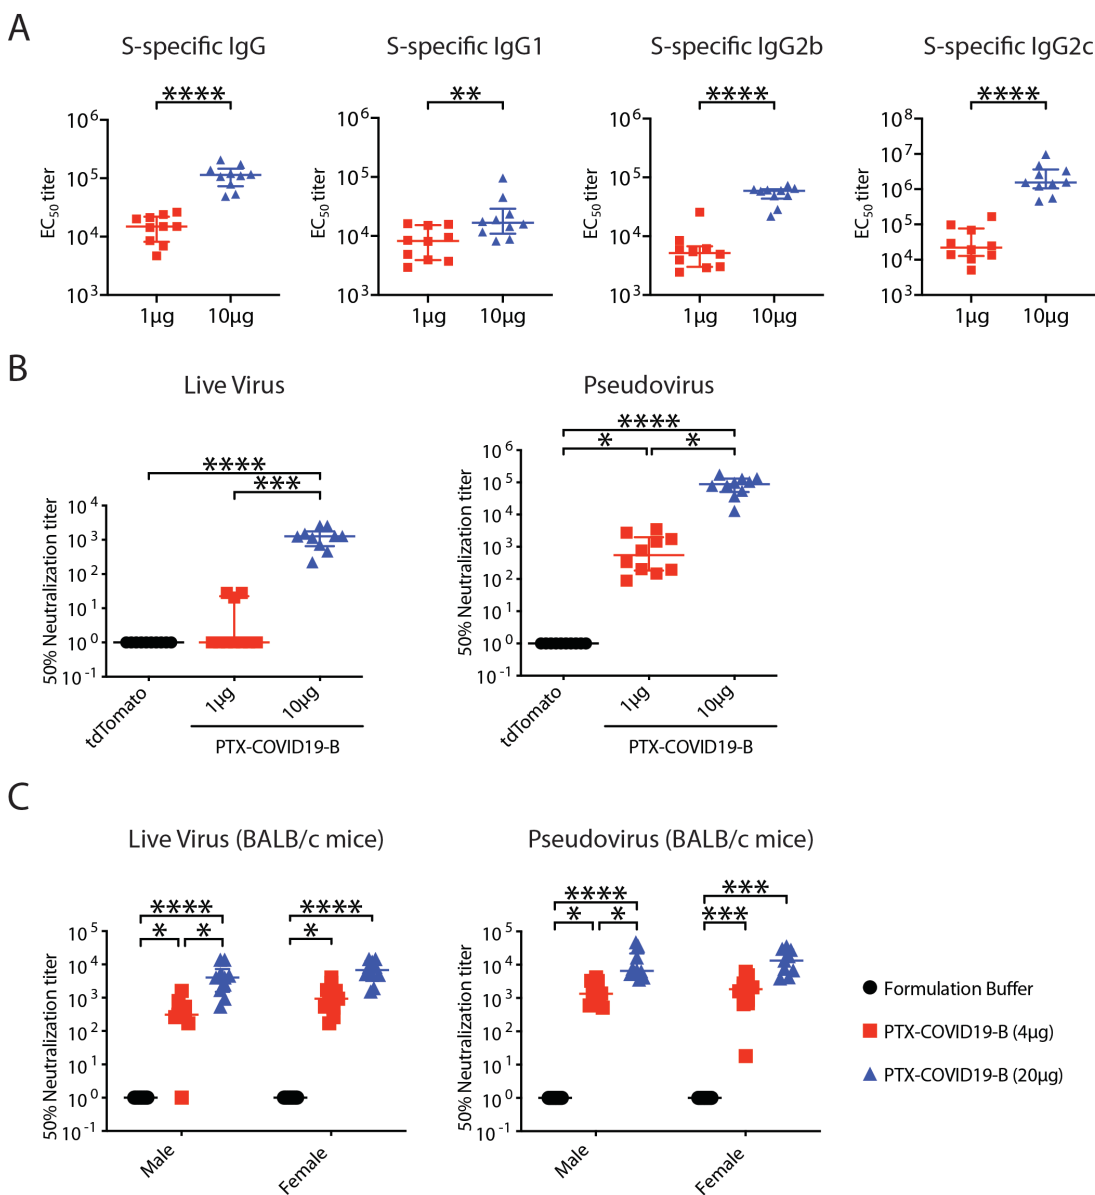

**Figure 2. PTX-COVID19-B elicits potent humoral immune responses in mice. (A)** and **(B)** Female C57BL/6 mice were vaccinated with 1µg or 10µg of PTX-COVID19-B or 10µg of control tdTomato mRNA. Three weeks after the second vaccination, blood was collected to detect (A) S-specific binding antibodies in the mouse sera as measured by ELISA and (B) neutralization of SARS-CoV-2 authentic virus or pseudovirus by the mouse sera. Shown in (A) are EC<sub>50</sub> titers. N=10 for each of the PTX-COVID19-B group.

Shown in (B) are 50% neutralization titers ( $ID_{50}$ ). N=10 per group. (C) Six- to 8-week old male and female BALB/c mice were vaccinated with 4  $\mu$ g or 20  $\mu$ g doses of PTX-COVID19-B or formulation buffer as control. Three weeks after the second vaccination, blood was collected to detect serum neutralization of SARS-CoV-2 authentic virus or pseudovirus by the mouse sera. Shown are 50% neutralization titers ( $ID_{50}$ ). N=10 per group except n=9 for the female 20  $\mu$ g dosed PTX-COVID19-B group in the pseudovirus assay. In (B) and (C) samples that did not neutralize viruses at the lowest dilution (1:20 for real virus, 1:40 for pseudovirus) are designated a 50% neutralization titer of 1. Each symbol represents one mouse. For each group, the long horizontal line indicates the median and the short lines below and above the median indicate the 25% and 75% percentile. \*:  $P < 0.05$ , \*\*:  $P < 0.01$ , \*\*\*:  $P < 0.001$ , \*\*\*\*:  $P < 0.0001$  as determined by one way ANOVA (Kruskal-Wallis test) followed by Dunn's multiple comparison test.

**Fig. 3**

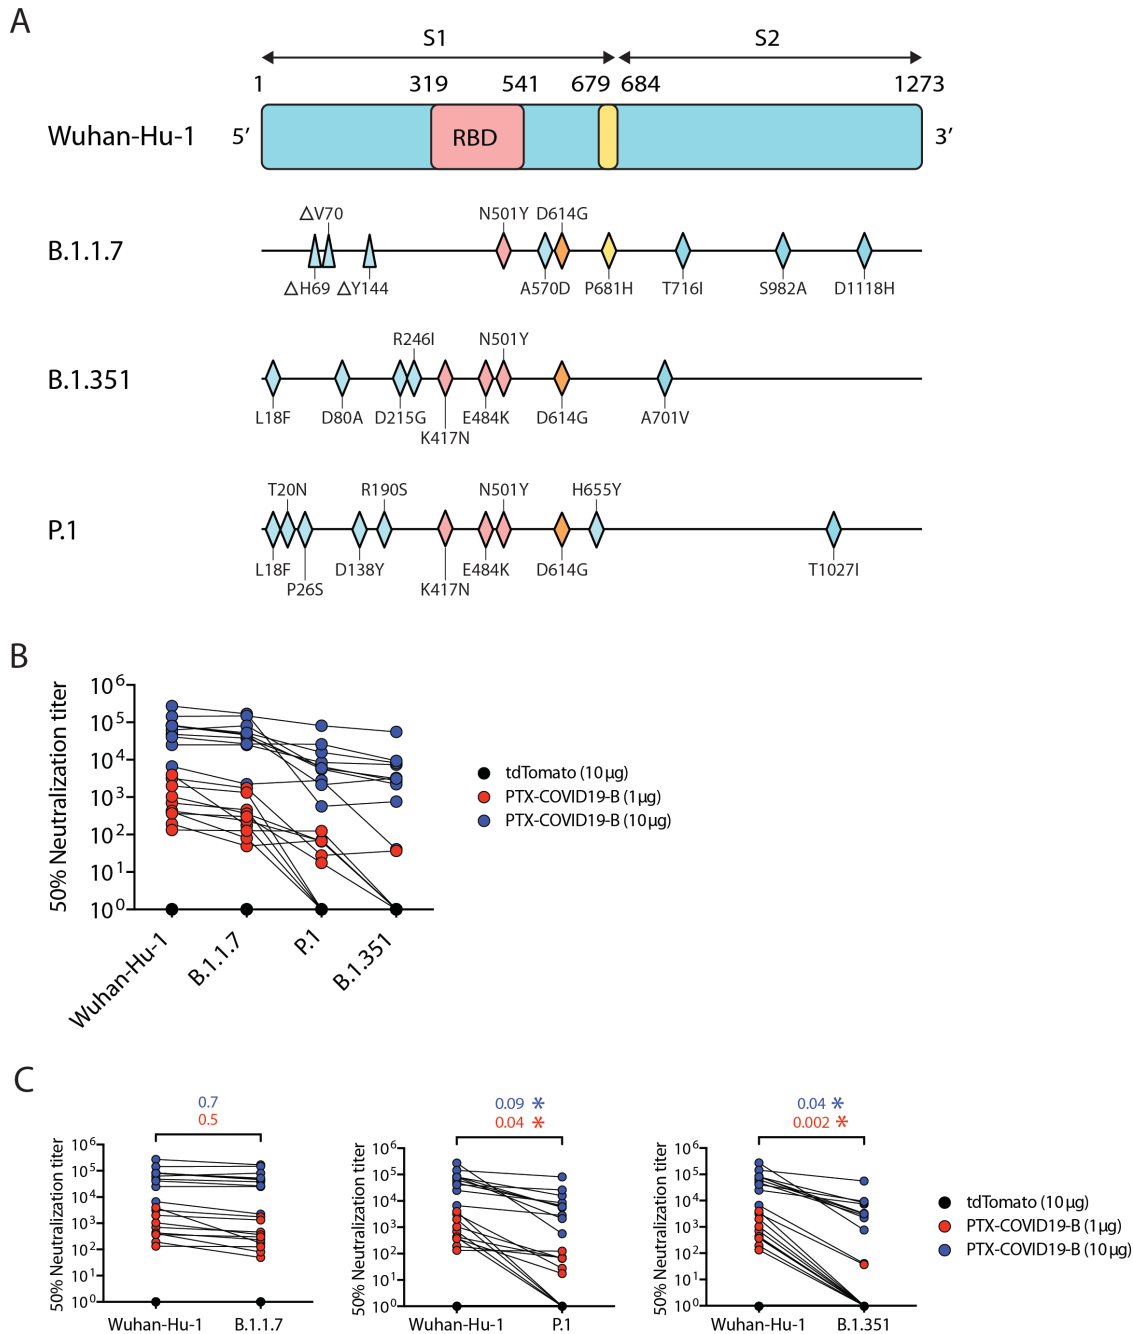

**Figure 3. Neutralization of VOCs by immune sera from PTX-COVID19-B**

**vaccinated mice. (A)** Schematic representation of S proteins from SARS-CoV-2 VOCs,

highlighting mutated amino acids compared to the ancestral Wuhan-Hu-1 isolate (triangles denoting deletions and rhombuses denoting replacements). **(B)** and **(C)** Neutralization of pseudoviruses bearing S protein from VOCs and Wuhan-Hu-1 isolate. C57BL/6 mice immune sera shown in Fig. 2 A and 2B were used in the neutralization. Shown in **(B)** are 50% neutralization titers across all pseudoviruses. Shown in **(C)** are pair-wise comparisons of the 50% neutralization titers between VOCs and the Wuhan-Hu-1 isolate. The numbers above the brackets in **(C)** are the ratios of the median 50% neutralization titers against the VOCs to the titers against Wuhan-Hu-1 isolate (blue: 10  $\mu$ g PTX-COVID19-B group, red: 1  $\mu$ g PTX-COVID19-B group). Each symbol represents one mouse. \*:  $P < 0.05$  as determined by two-tailed paired t test.

**Fig. 4**

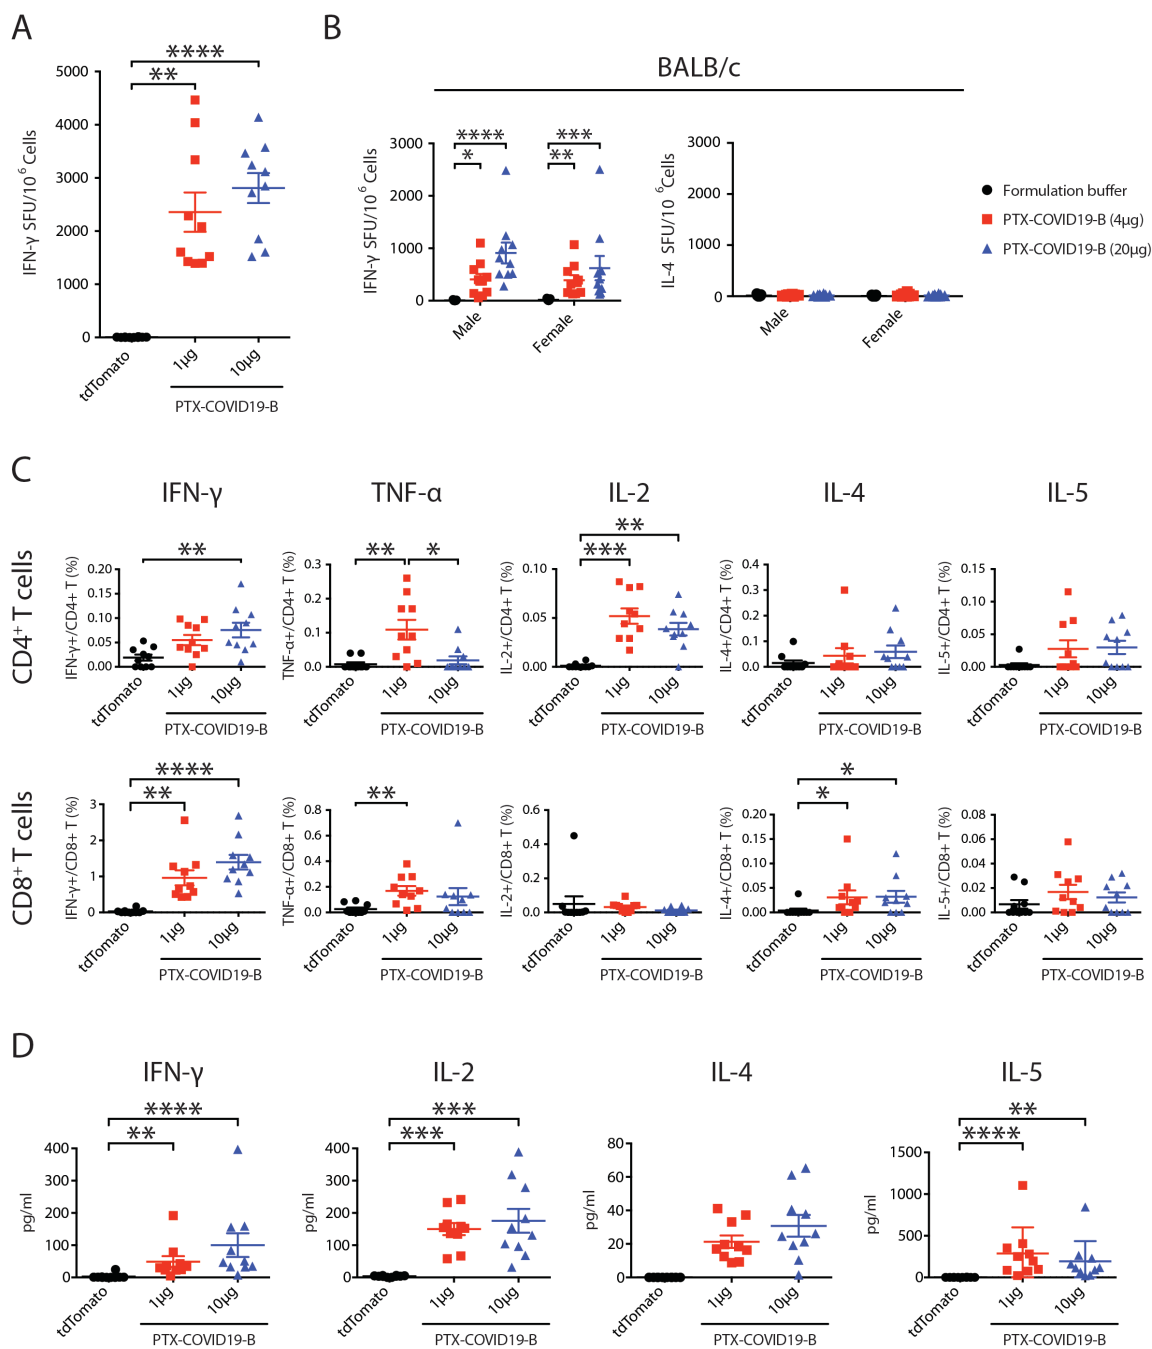

**Figure 4. PTX-COVID19-B elicits robust cellular immune responses in mice. (A), (C) and (D)** Female C57BL/6 mice were vaccinated with 1 $\mu$ g or 10  $\mu$ g doses of PTX-COVID19-B or 10  $\mu$ g of tdTomato mRNA. **(B)** Male and female BALB/C mice were vaccinated with 4  $\mu$ g or 20  $\mu$ g doses of PTX-COVID19-B or formulation buffer as

control. Three weeks after the second vaccination, spleens were collected and the splenocytes were stimulated with SARS-CoV-2 S peptide pool to detect cytokine production as measured by ELISPOT shown in (A) and (B), intracellular cytokine staining and flow cytometry shown in (C), and a multiplex immunoassay shown in (D). Shown in (A) are the numbers of IFN- $\gamma$  spot forming units (SFU) per million splenocytes (n=10 per group), (B) are the numbers of IFN- $\gamma$  and IL-4 spot forming units (SFU) per million splenocytes (n=9 for each of the formulation groups, n=10 for each of the PTX-COVID19-B groups), (C) percentage of cytokine-producing cells in CD4<sup>+</sup> or CD8<sup>+</sup> T cells (n=10 per group), and (D) quantity of the cytokines in the supernatants of the stimulated splenocytes (n=10 per group). Each symbol represents one mouse. For each group, the long horizontal line indicates the mean and the short lines below and above the mean indicate the SEM. \*:  $P < 0.05$ , \*\*:  $P < 0.01$ , \*\*\*:  $P < 0.001$ , \*\*\*\*:  $P < 0.0001$  as determined by one way ANOVA (Kruskal-Wallis test) followed by Dunn's multiple comparison test.

**Fig. 5**

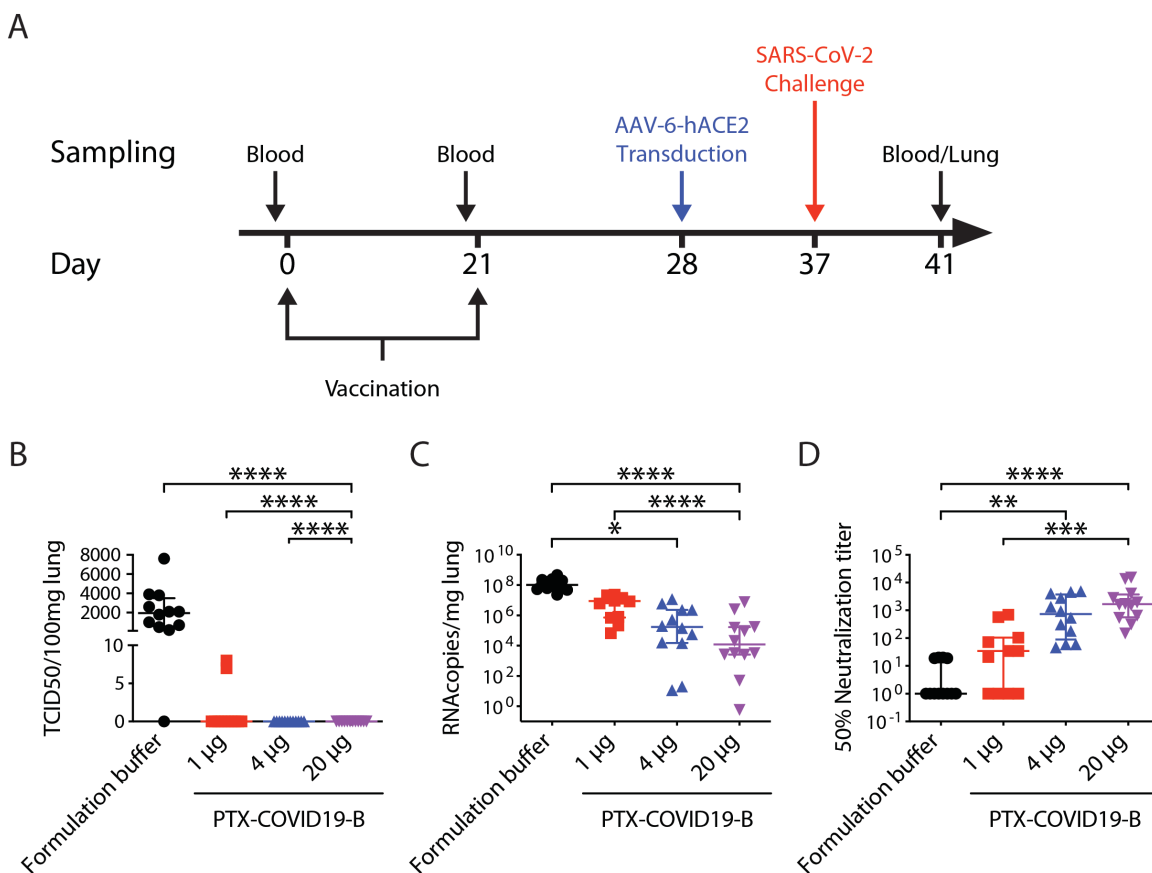

**Figure 5. PTX-COVID19-B protects mice from SARS-CoV-2 challenge.** (A) Mice vaccination and challenge regimen. Six- to 8-week old female C57BL/6 mice (n=10 per group) were vaccinated twice with 1 µg, 4 µg or 20 µg doses of PTX-COVID19-B or formulation buffer as control. One week after the second vaccination, mice were intranasally transduced with AAV6-hACE2. Nine days after the transduction, mice were intranasally challenged with SARS-CoV-2. One day before each vaccination, blood was collected from the mice. Four days after SARS-CoV2 challenge, mice were humanly euthanized and blood and lungs were collected from the mice. (B) Amount of infectious SARS-CoV-2 virus and (C) SARS-CoV-2 RNA in the lungs of the mice. Shown in (B) are TCID<sub>50</sub>/100mg lung tissue (n=10 per group) and (C) RNA copies/mg lung tissue

(n=10 per group). **(D)** Neutralization of SARS-CoV-2 authentic virus by the mouse sera collected 4 days after SARS-CoV-2 challenge. Shown are 50% neutralization titers ( $ID_{50}$ , n=10 per group). Samples that did not neutralize viruses at the lowest dilution (1:20) are designated a 50% neutralization titer of 1. Each symbol represents one mouse. For each group, the long horizontal line indicates the median and the short lines below and above the median indicate the 25% and 75% percentile. \*:  $P < 0.05$ , \*\*:  $P < 0.01$ , \*\*\*:  $P < 0.001$ , \*\*\*\*:  $P < 0.0001$  as determined by one way ANOVA (Kruskal-Wallis test) followed by Dunn's multiple comparison test.



**Fig. 6**

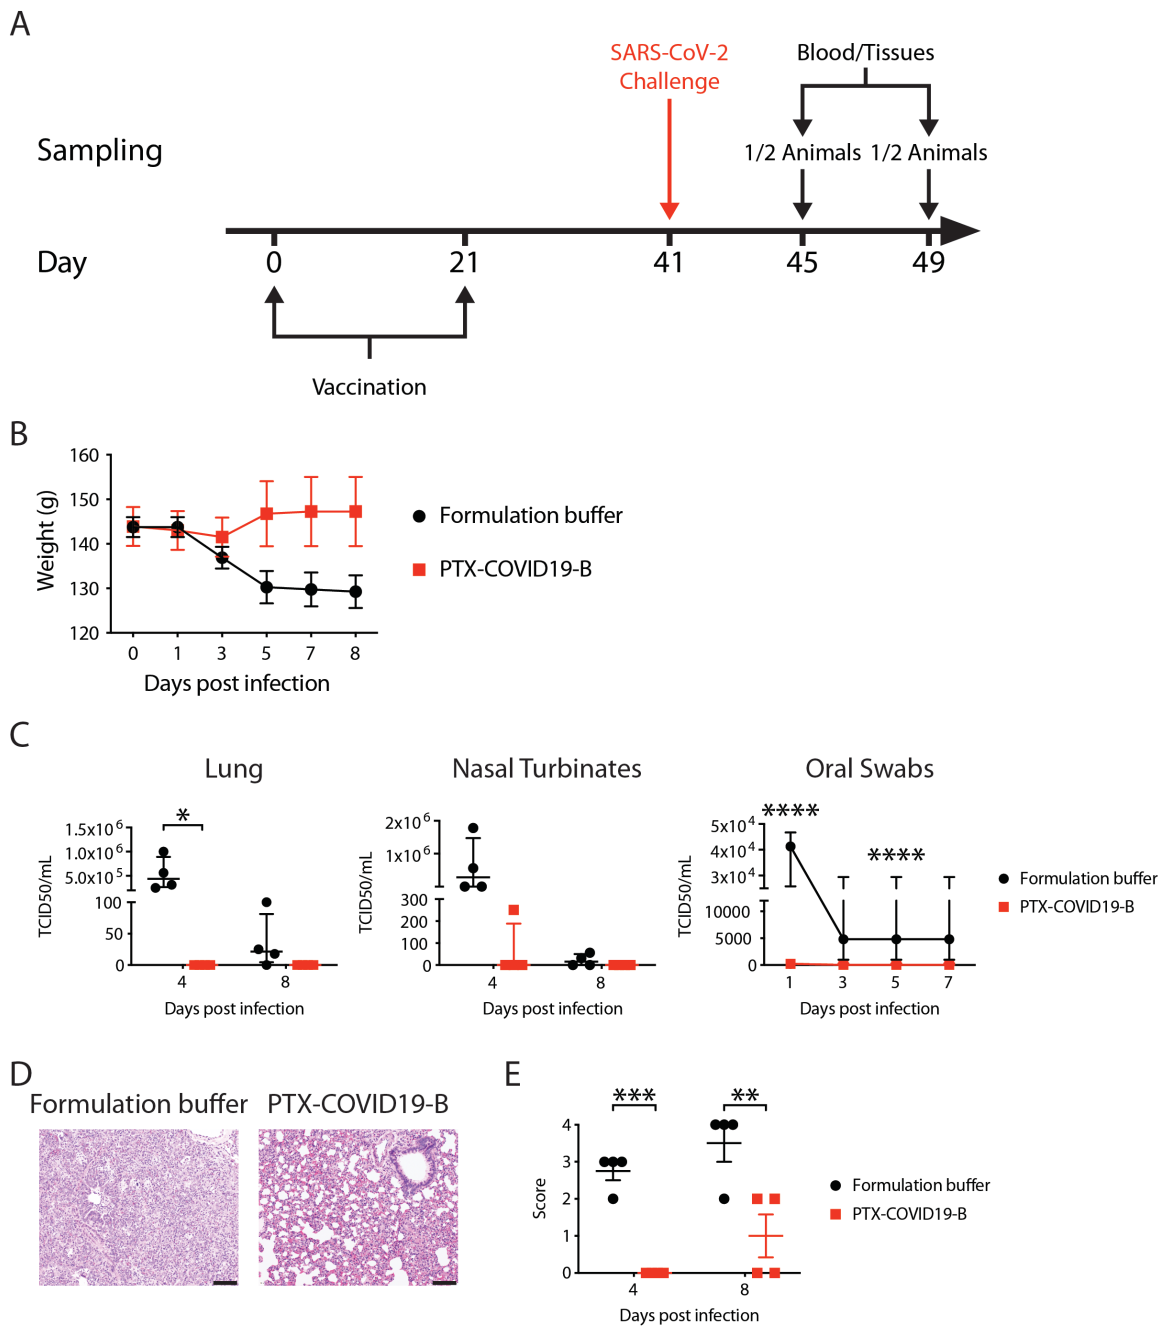

**Figure 6. PTX-COVID19-B protects hamsters from SARS-CoV-2 challenge. (A)**

Hamster vaccination and SARS-CoV-2 challenge regimen. Six- to 10-week old male Syrian hamsters (n=8) were vaccinated with a 20  $\mu$ g dose of PTX-COVID19-B or formulation buffer twice with a 3-week interval. Twenty days after the second

vaccination, hamsters were challenged intranasally with SARS-CoV-2. Four days and 8 days after the challenge, half of the animals in each group (4 animals per group) were humanly euthanized and blood and tissues were collected. **(B)** Body weight of the hamsters. Symbols indicate the means, and the error bars indicate SEM for each group. N=8 per group from day 0 to day 3. N=4 from day 5 to day 8. **(C)** Amount of infectious SARS-CoV-2 virus in the hamster tissues. Shown are TCID<sub>50</sub> per ml of the tissue homogenates (lung and nasal turbinates) or per ml of oral swab samples. For lungs and nasal turbinates, each symbol represents one hamster (n=4 per group per time point), and the long horizontal line indicates the median and the short lines below and above the median indicate the 25% and 75% percentile. For oral swabs, symbols indicate the medians, and the error bars indicate the 25% and 75% percentile. (n=8 per group from day 0 to day 3 and n=4 from day 5 to day 7). **(D)** Representative micrographs of the hamster lungs, showing extensive acute and mixed inflammatory cell infiltrates in bronchiole and alveoli in a control hamster receiving formulation buffer and paucity of inflammation in a vaccinated animal after challenged with SARS-CoV-2. Scale bar=100µm. **(E)** Pathology score of the hamster lungs. Shown are semiquantitative pathology scores of the hamster lungs. Each symbol represents one hamster (n=4 per group per time point). The long horizontal lines indicate the means and the short lines below and above the mean indicate the SEM. \*:  $P<0.05$ , \*\*:  $P<0.01$ , \*\*\*:  $P<0.001$ , \*\*\*\*:  $P<0.0001$  as determined by two way ANOVA followed by Sidak's multiple comparison test.
